# Supplementary material for: Construction of 5-(Alkylamino)-6-aryl/alkylpyrazine-2,3-dicarbonitriles via the One-Pot Reaction of Alkyl Isocyanides with Aryl/Alkyl Carbonyl Chlorides and Diaminomaleonitrile: Fluorescence and Antimicrobial Activity Evaluation
Source: MDPI journal article supplement (doi:10.3390/molecules27238278), 2022-11-27
Supplement: s1 [file s1]

# **Construction of 5-(Alkylamino)-6-aryl/alkylpyrazine-2,3-dicarbonitriles via the One-Pot Reaction of Alkyl Isocyanides with Aryl/Alkyl Carbonyl Chlorides and Diaminomaleonitrile: Fluorescence and Antimicrobial Activity Evaluation**

**Amal Al-Azmi \* and Elizabeth John**

Chemistry Department, Kuwait University, P.O. Box 5969, Safat 13060, Kuwait

\* Correspondence: [amalrchem@gmail.com](mailto:amalrchem@gmail.com) or [amal.alazemi@ku.edu.kw](mailto:amal.alazemi@ku.edu.kw)

## **Table of Contents**

|                                                       |              |
|-------------------------------------------------------|--------------|
| <b>NMR Spectra .....</b>                              | <b>2-13</b>  |
| <b>Mass spectra.....</b>                              | <b>14-20</b> |
| <b>HRMS .....</b>                                     | <b>21-28</b> |
| <b>Single Crystal X-ray Diffraction Studies .....</b> | <b>30-41</b> |

## NMR spectra

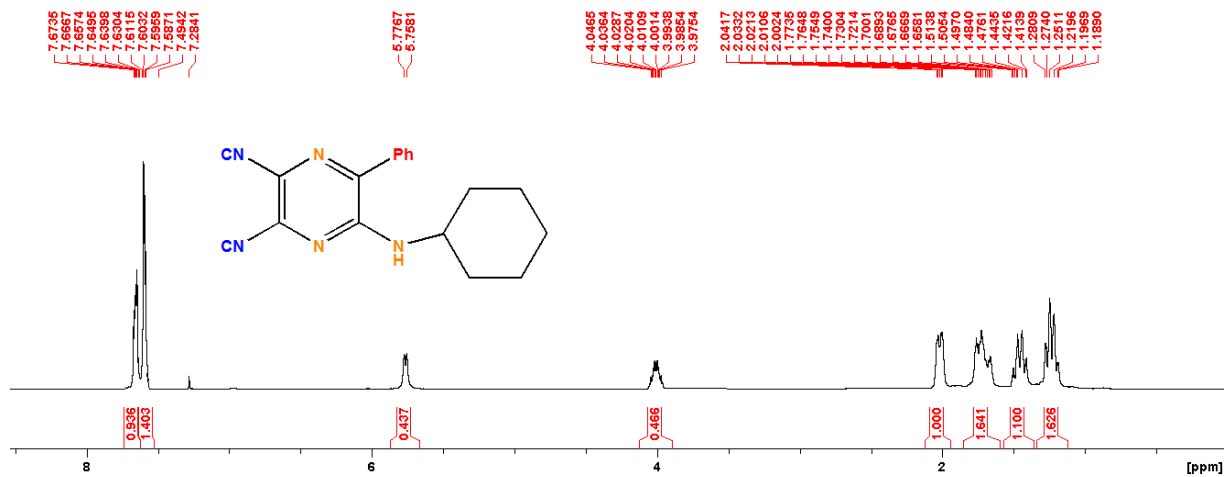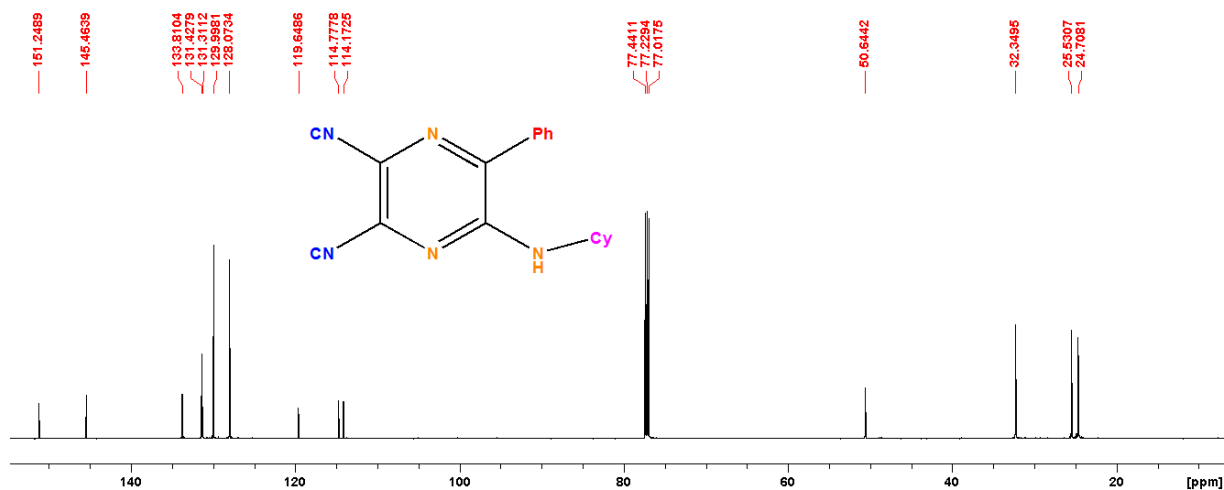

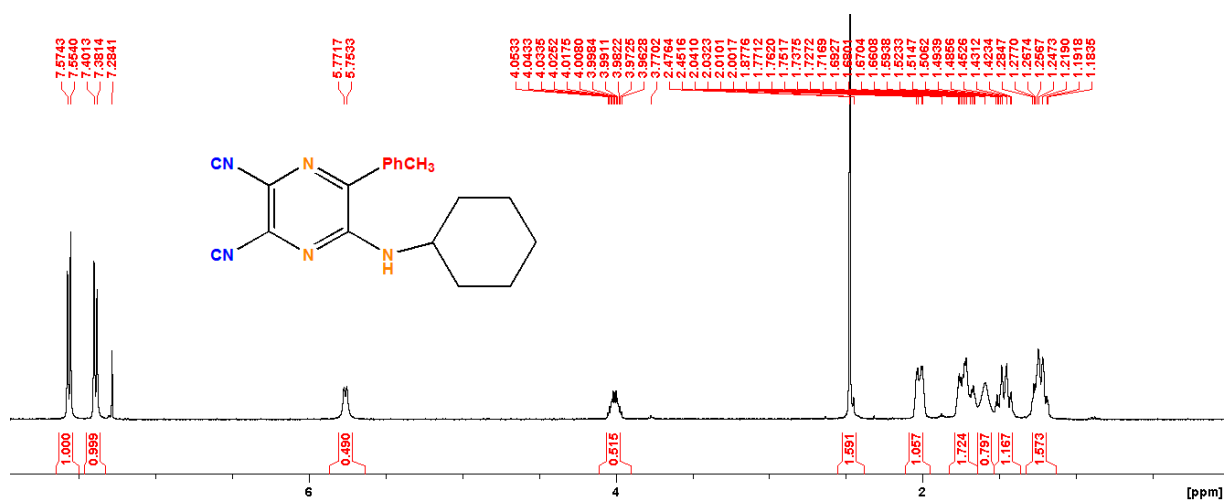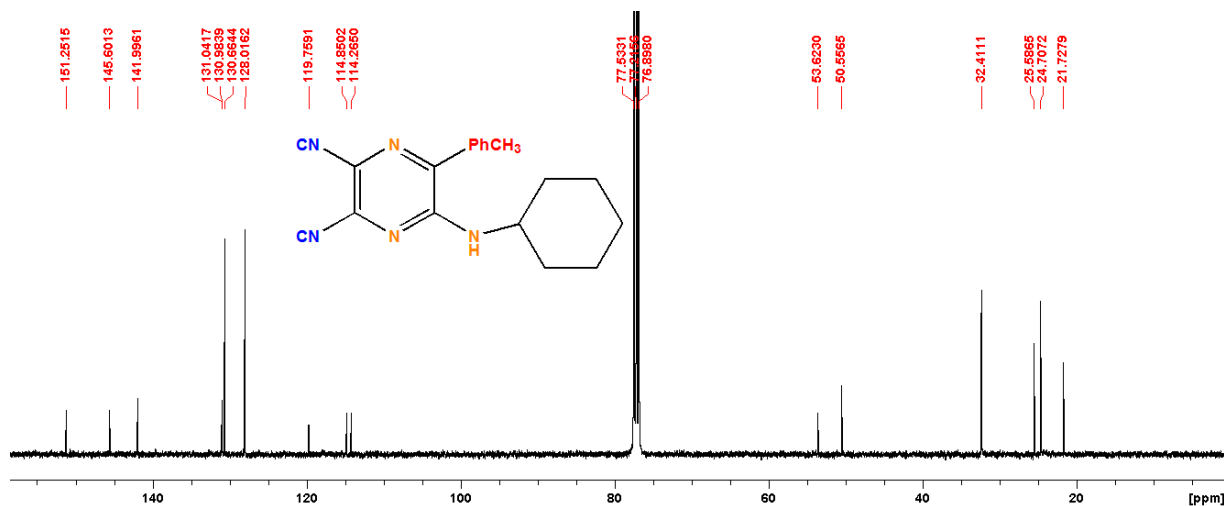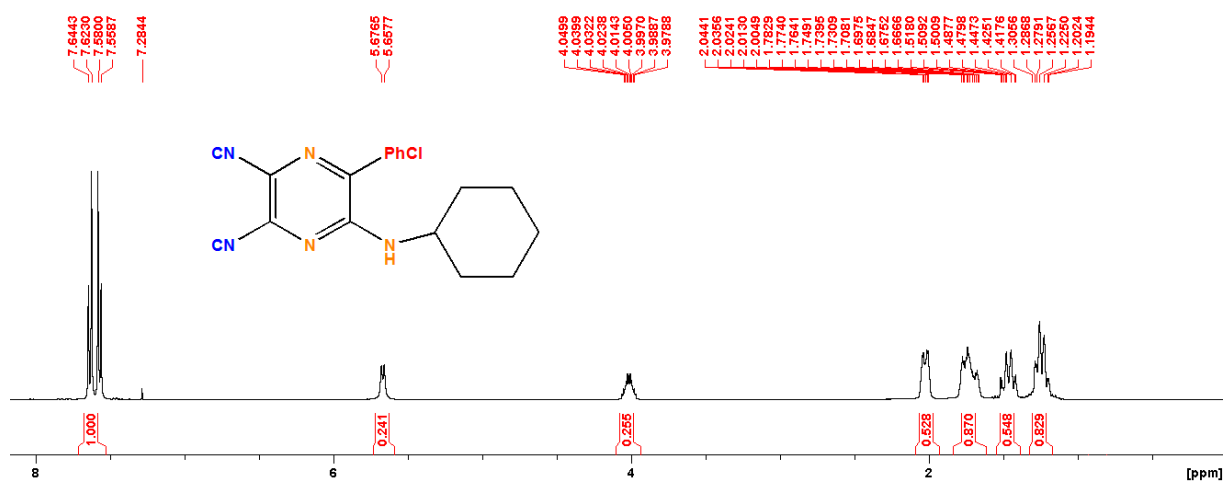

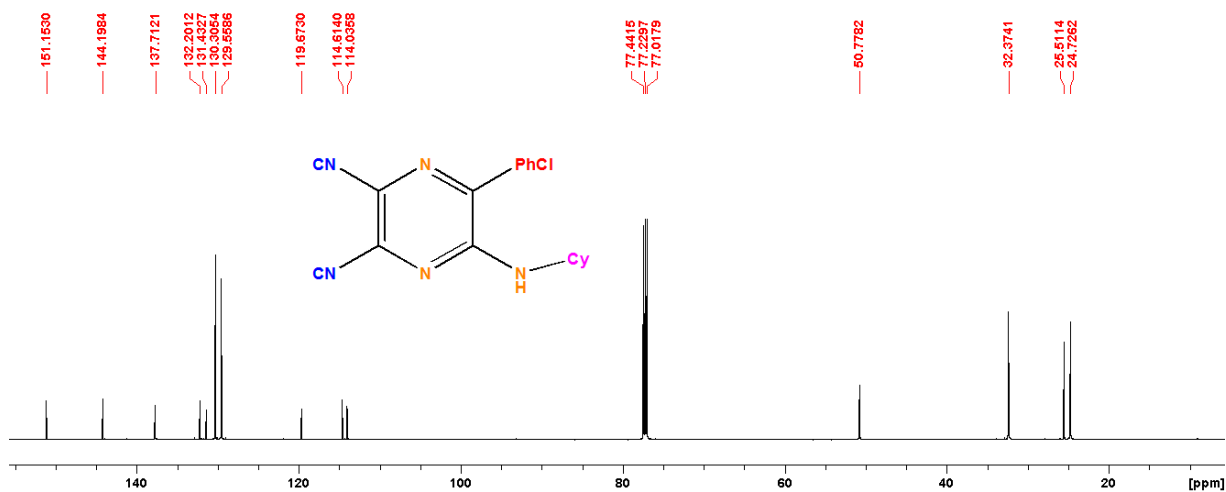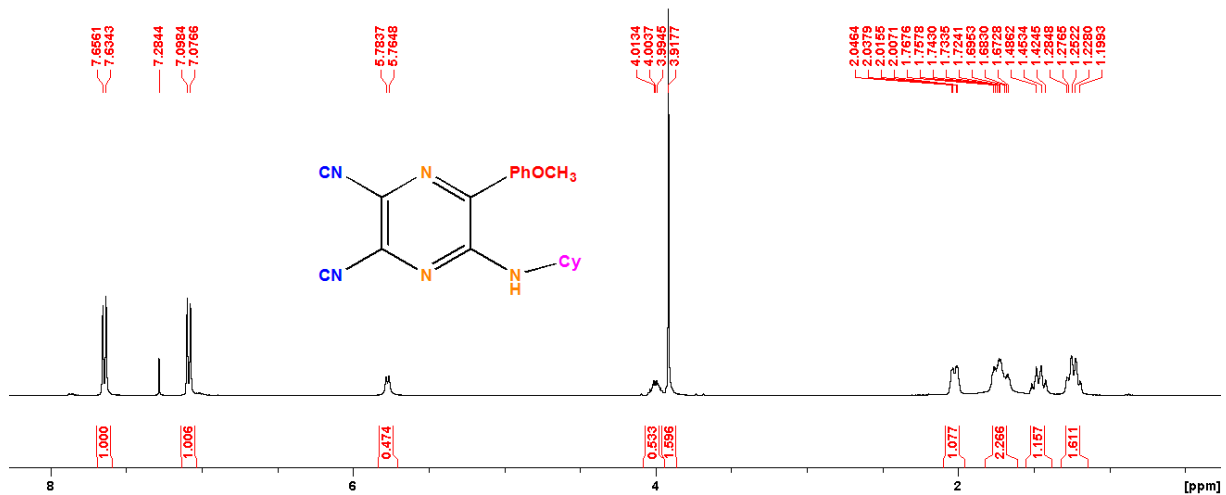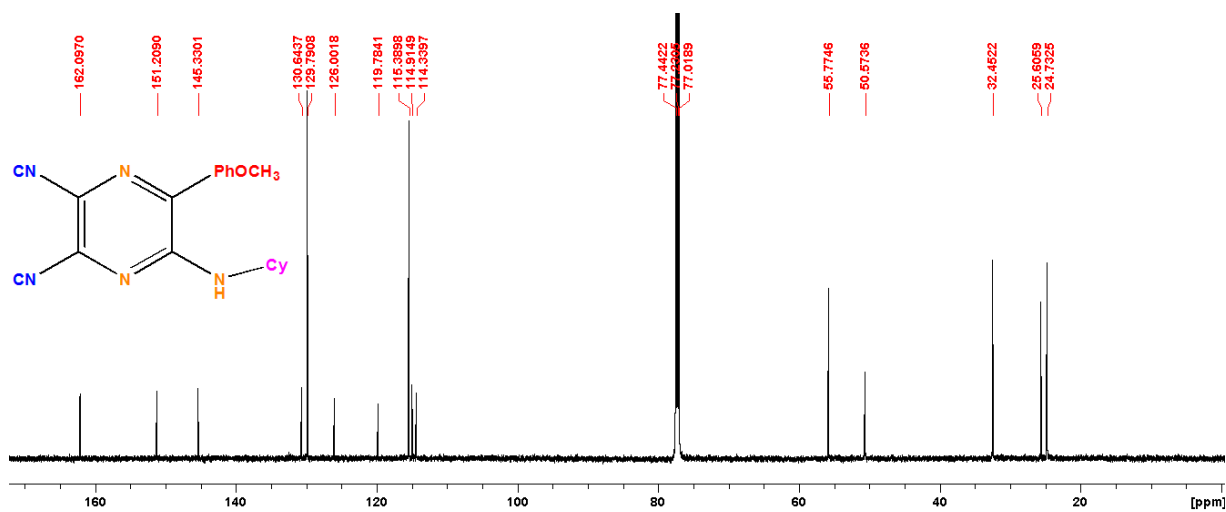

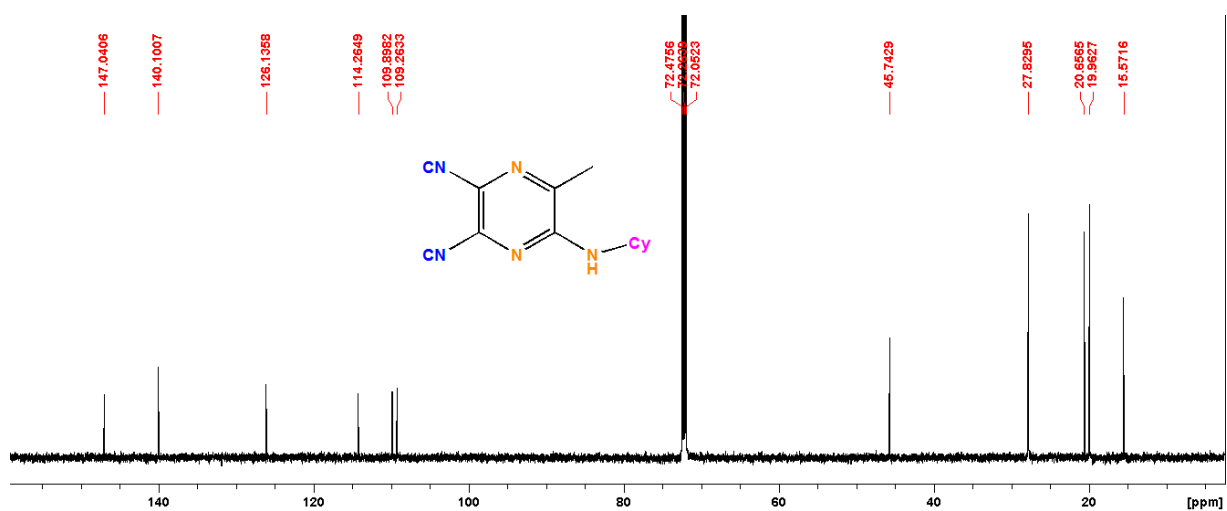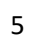

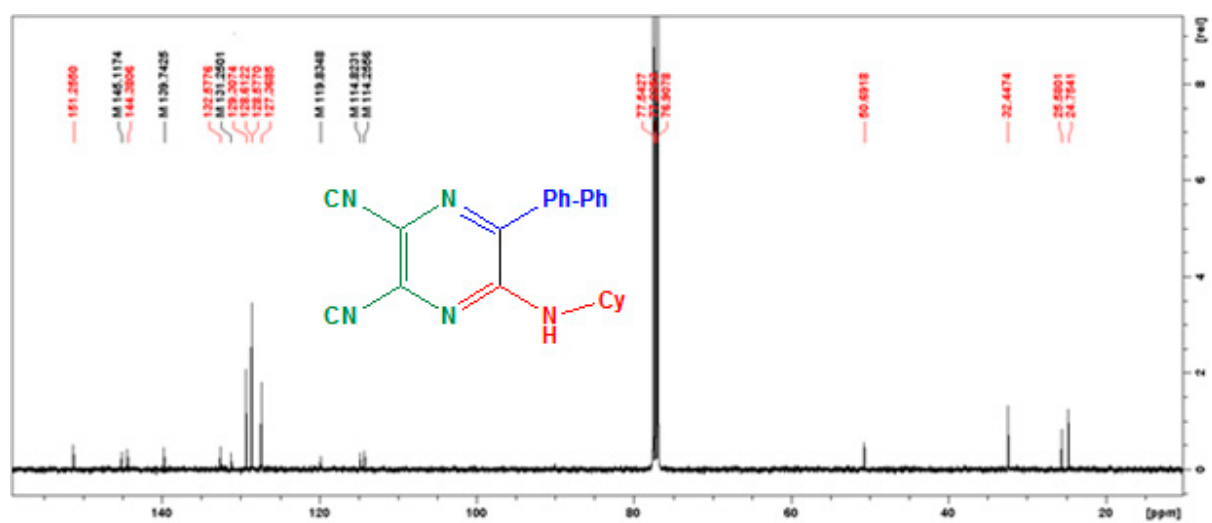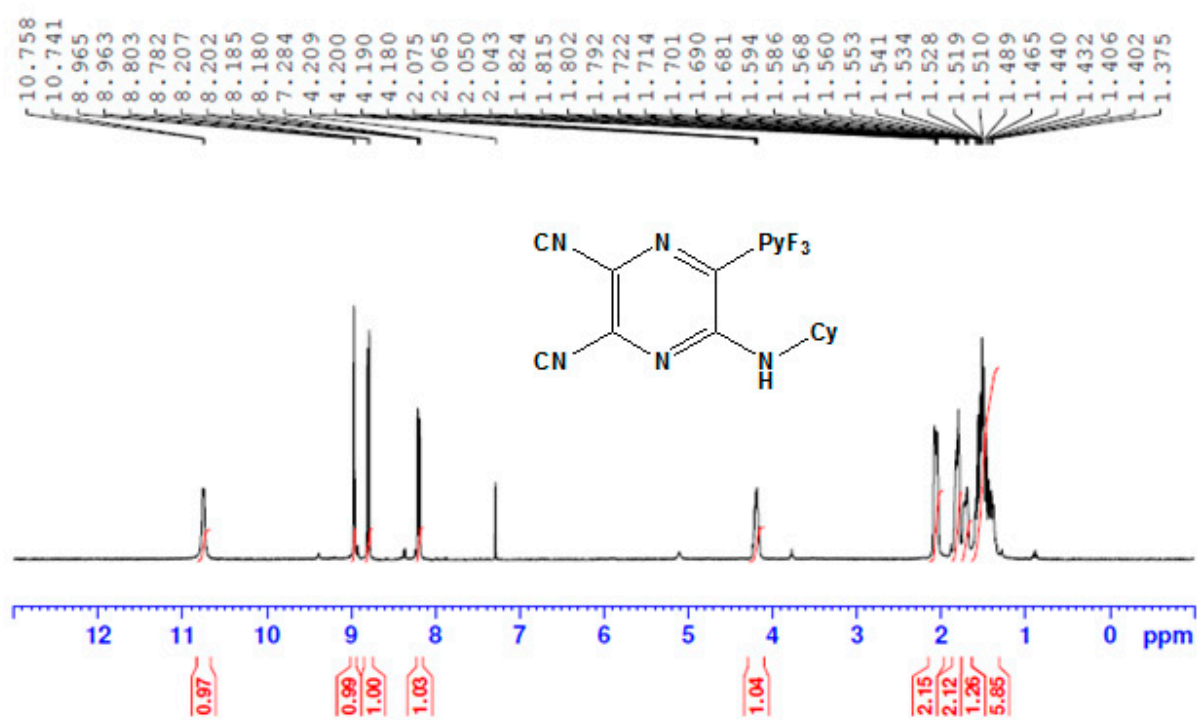

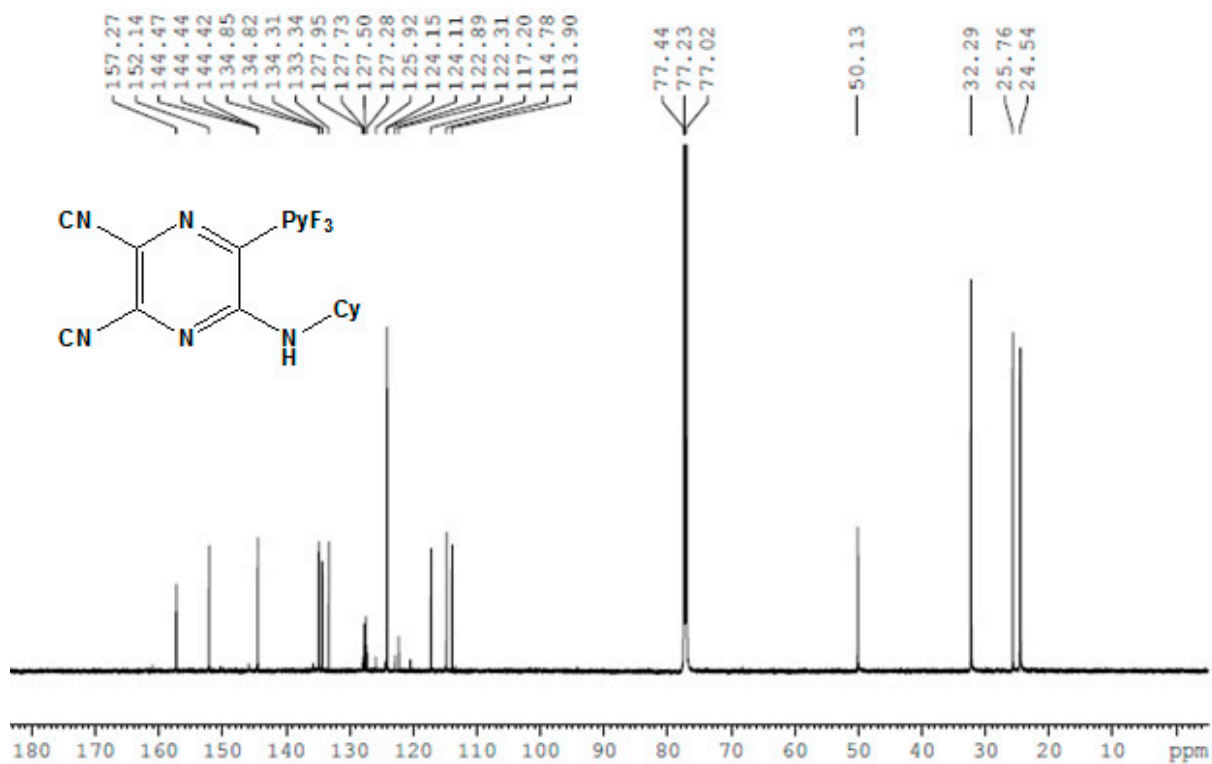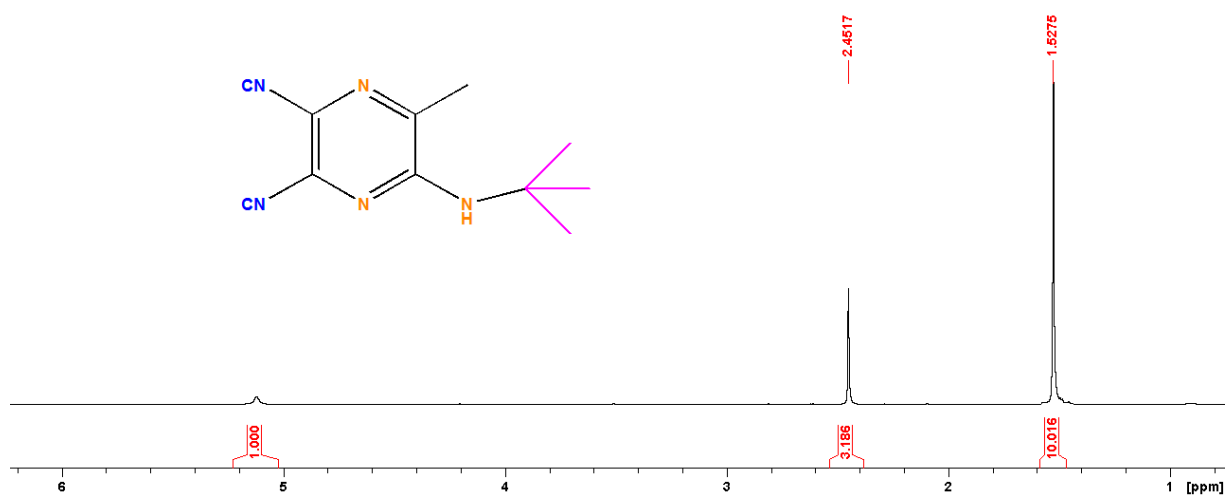

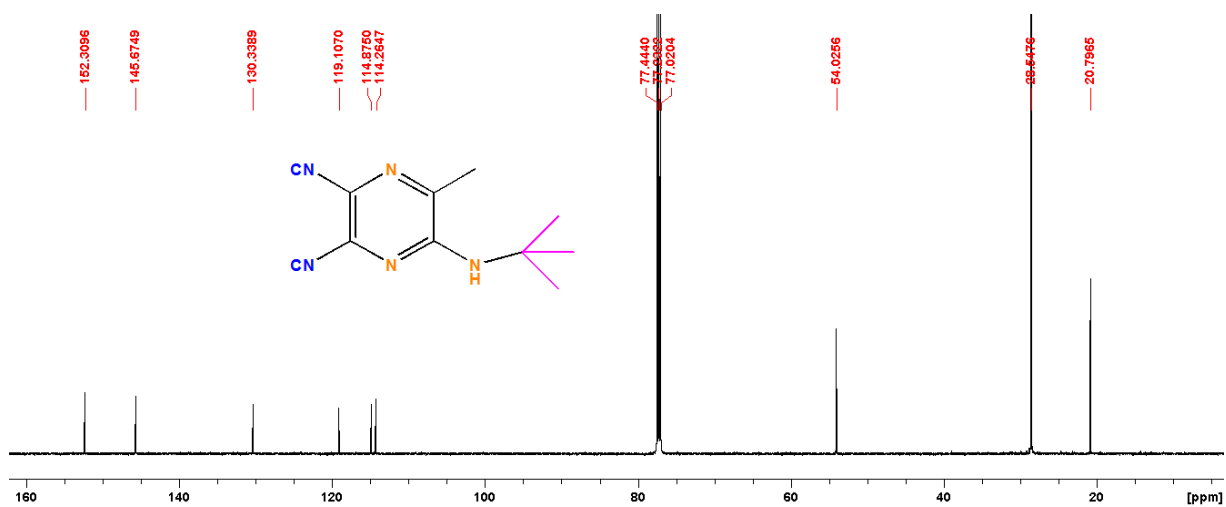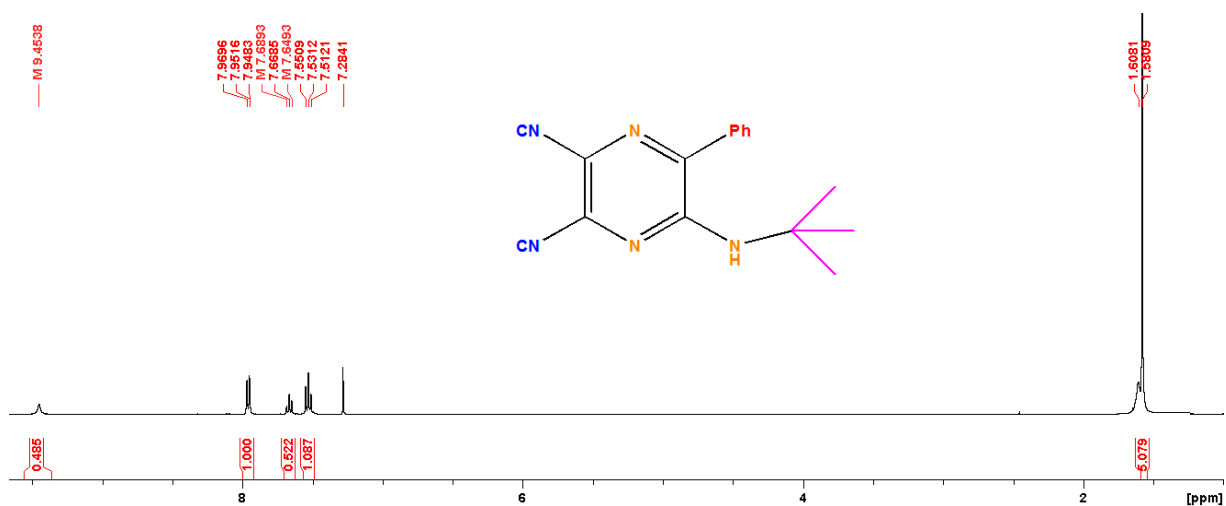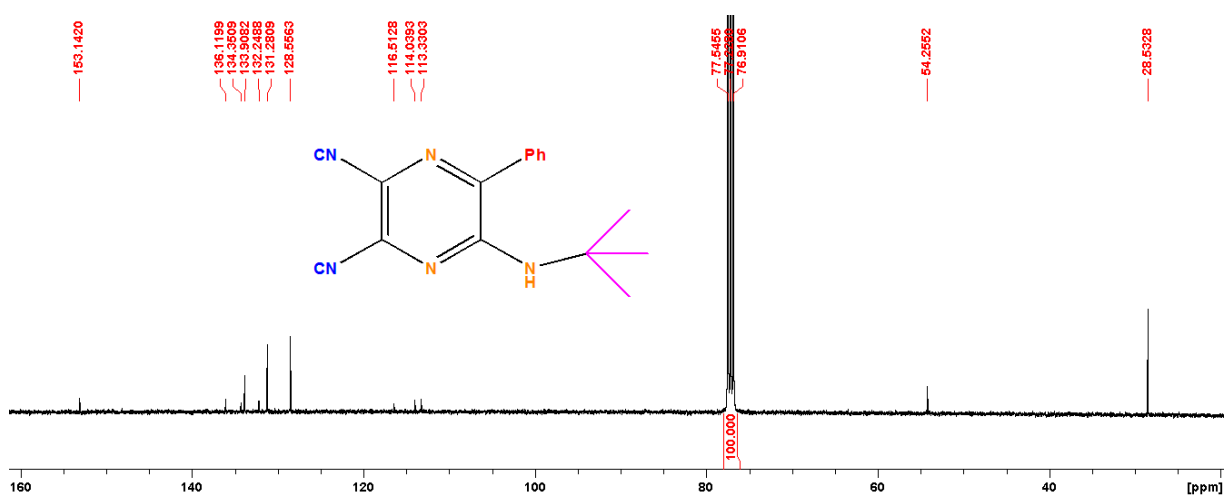



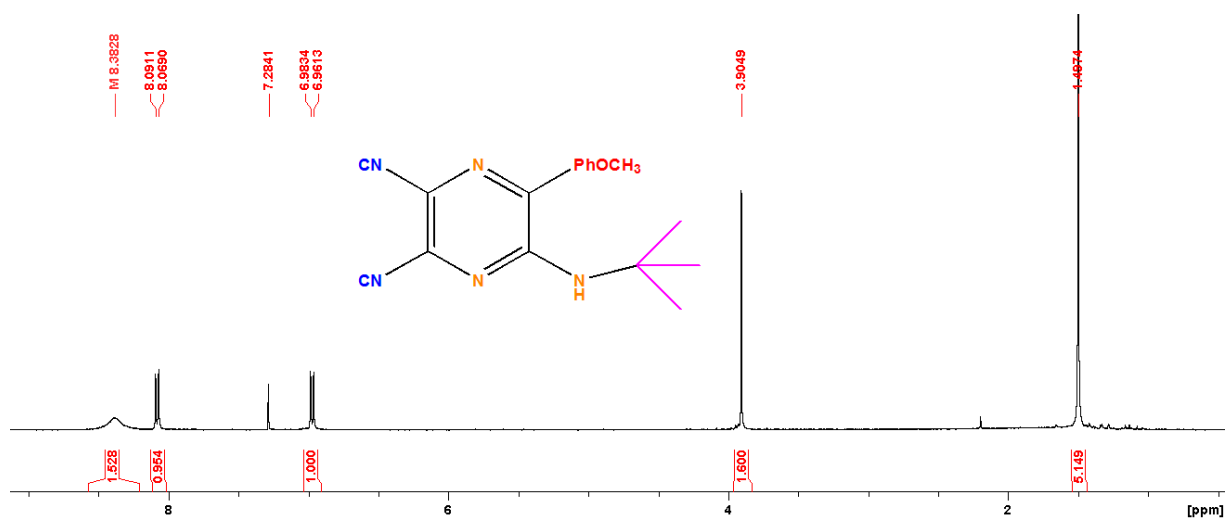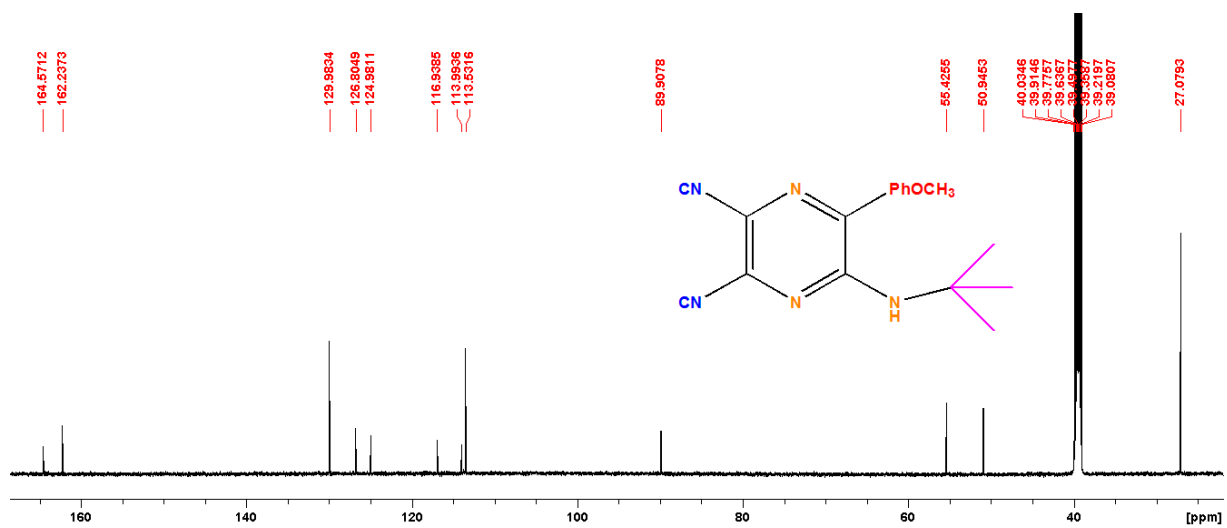

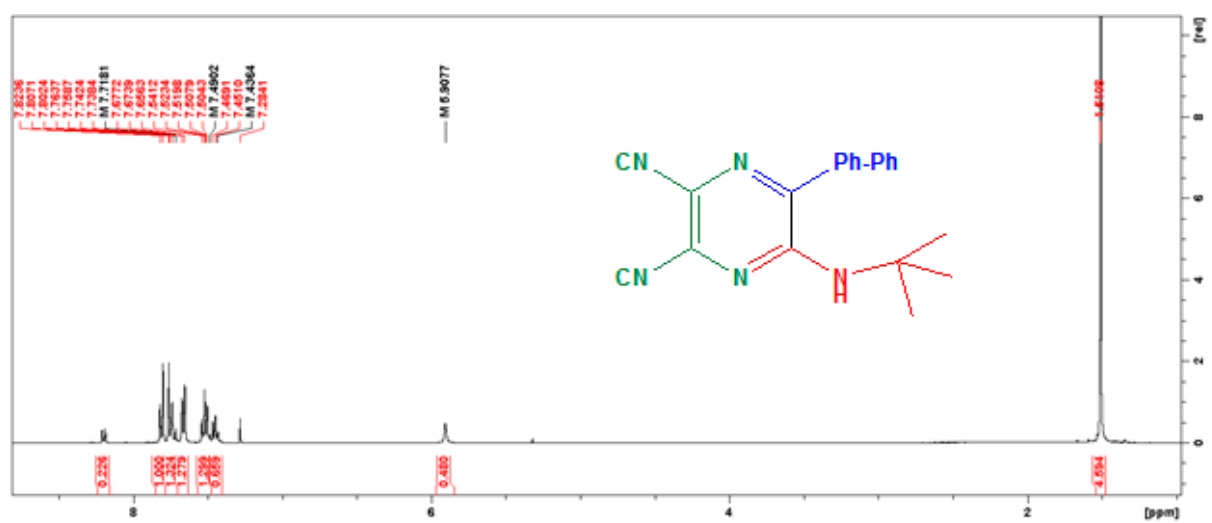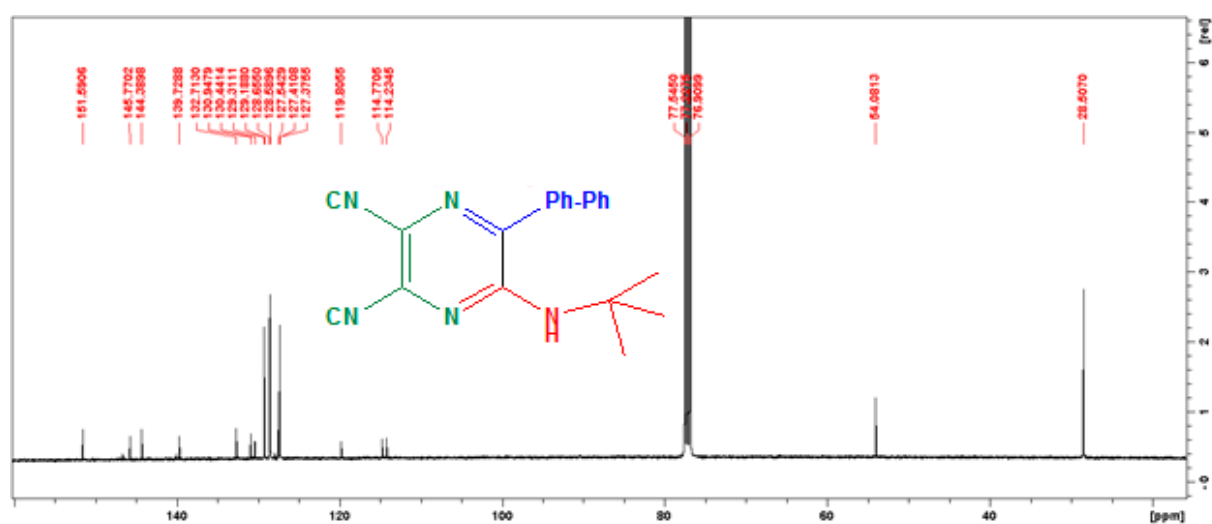

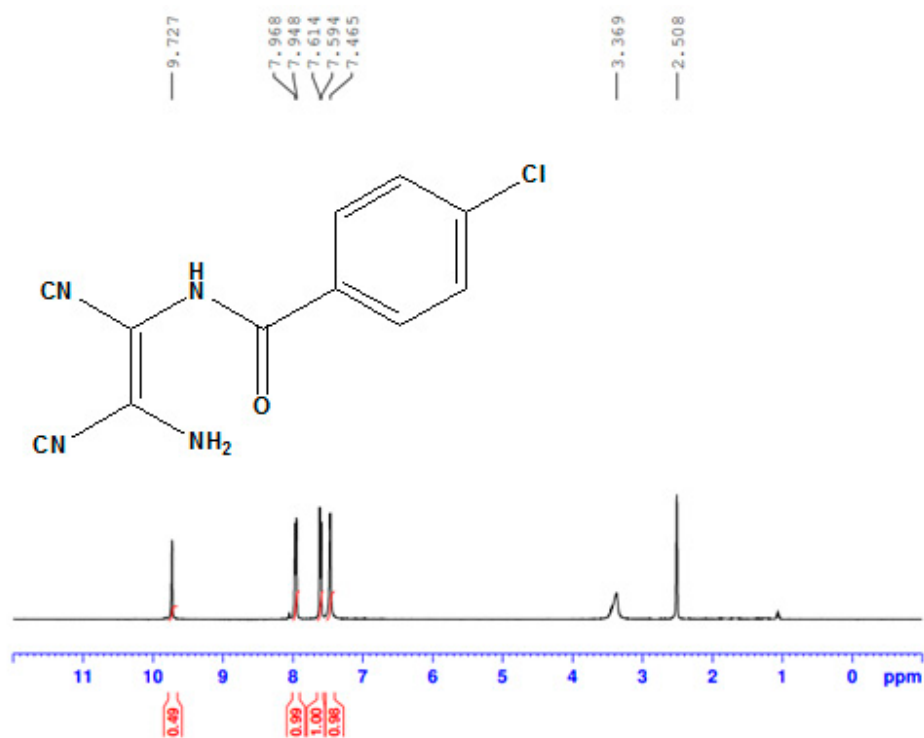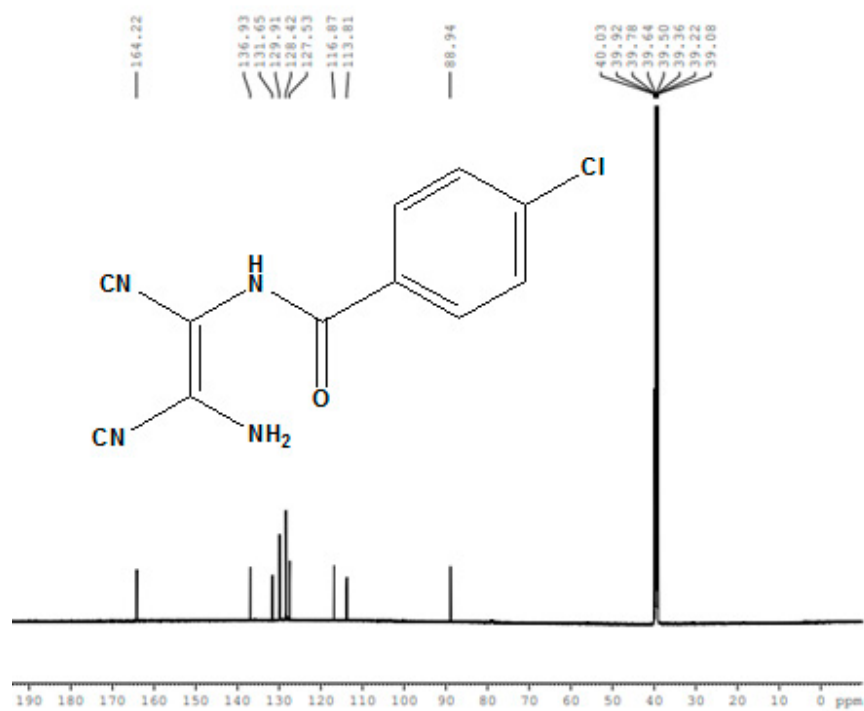

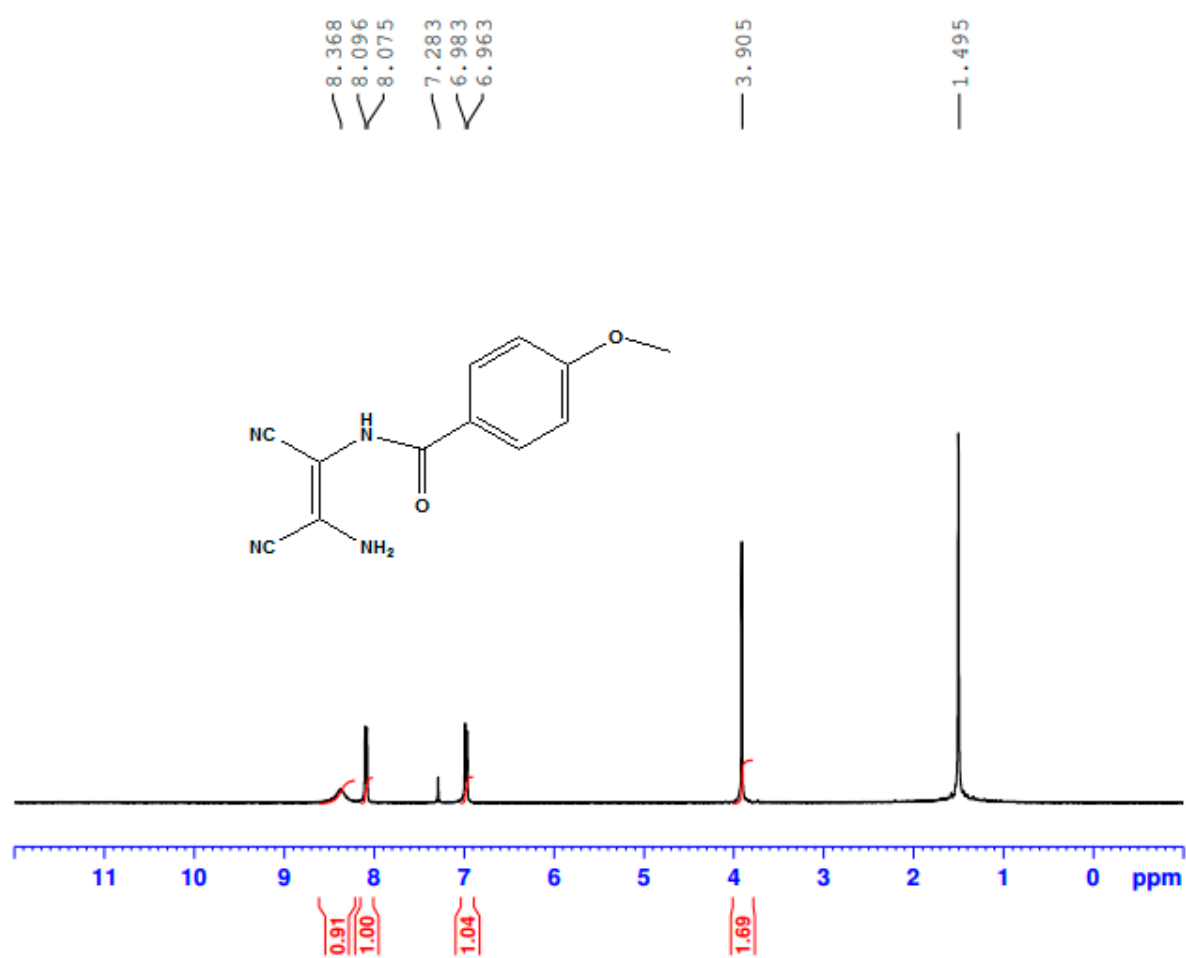

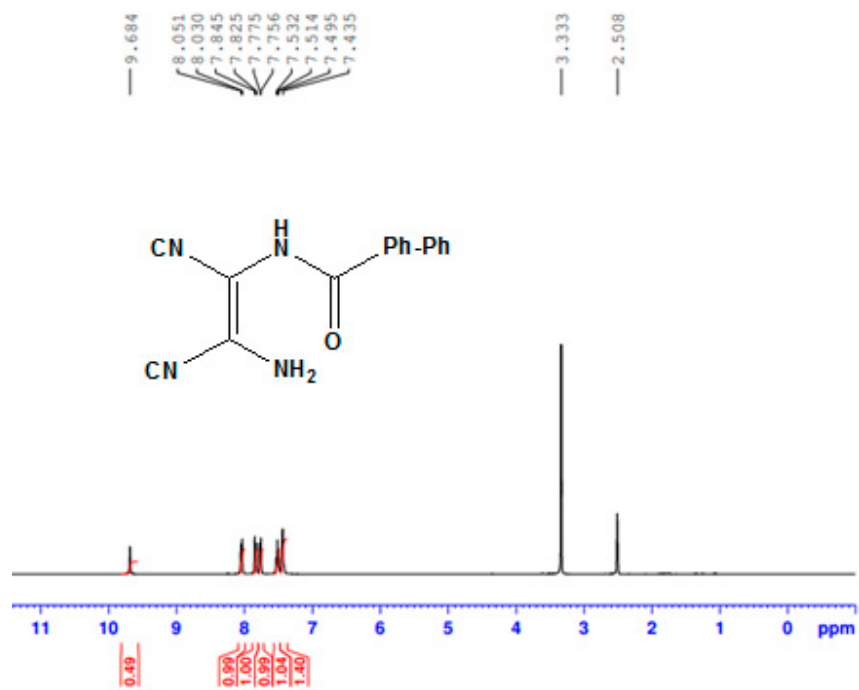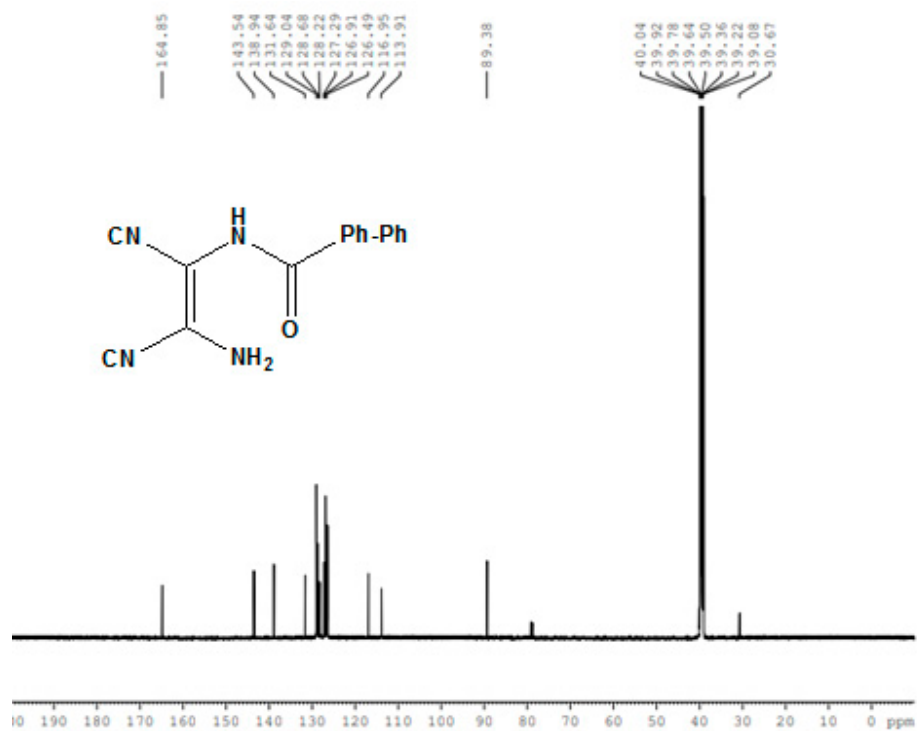

## Mass spectra

303 #95 RT: 4.58 AV: 1 NL: 5.17E7  
T: + c EI Full ms [49.50-1200.50]

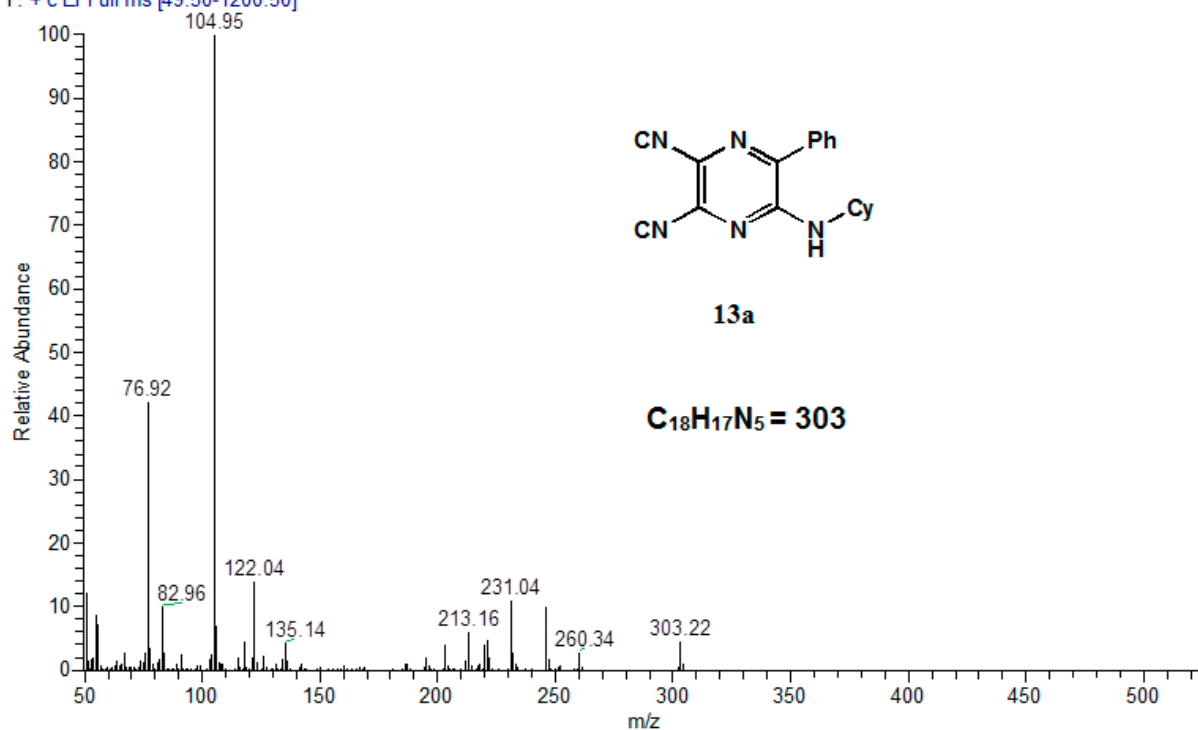

MCY #83 RT: 3.99 AV: 1 NL: 6.38E7  
T: + c EI Full ms [49.50-1200.50]

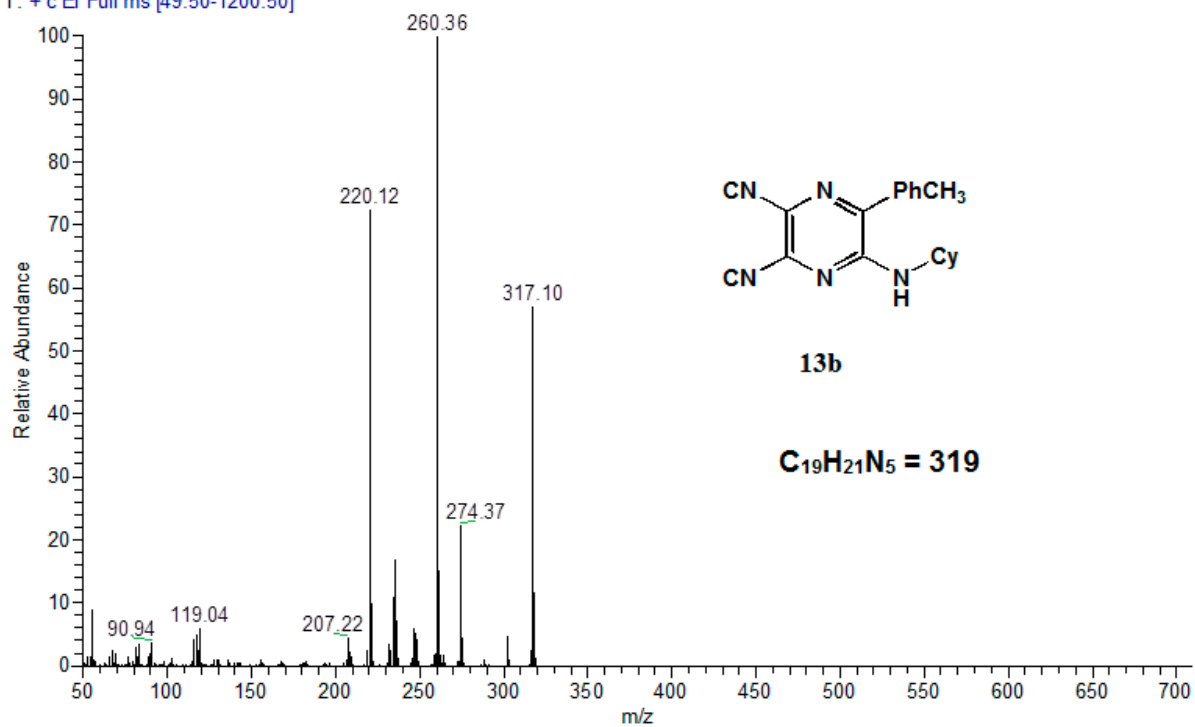

CCYS #106 RT: 5.09 AV: 1 NL: 8.64E7  
T: + c EI Full ms [49.50-1200.50]

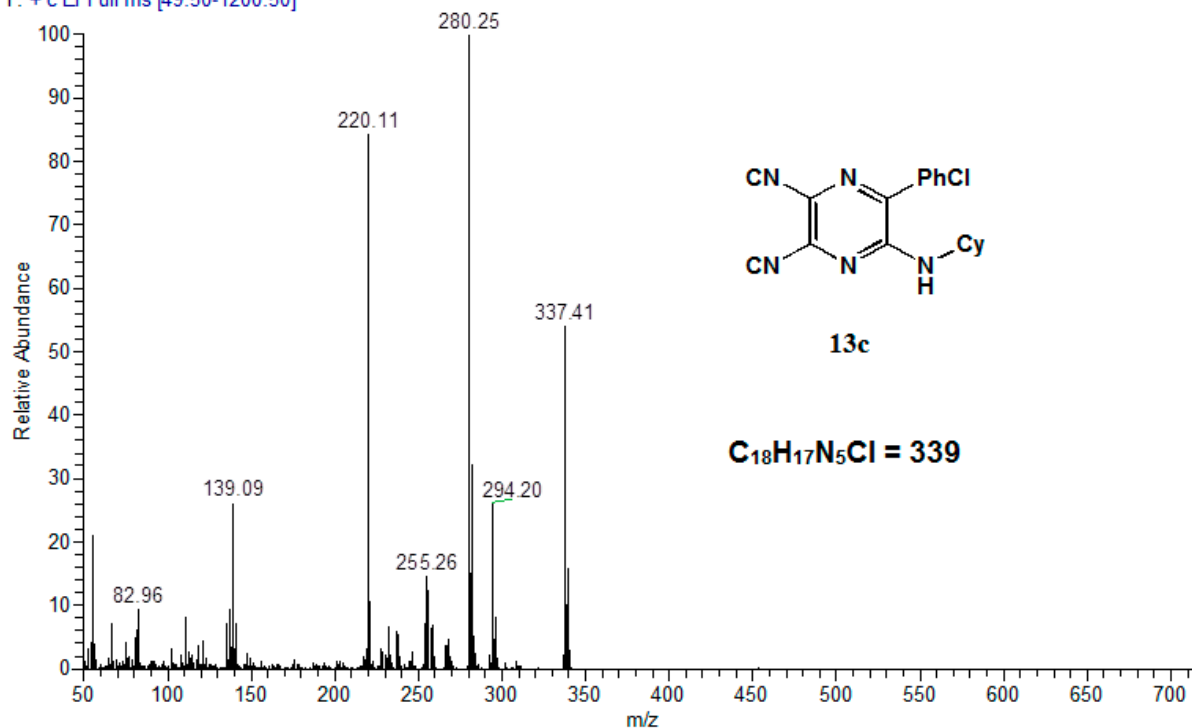

COM #123 RT: 5.93 AV: 1 NL: 5.34E7  
+ c EI Full ms [49.50-1200.50]

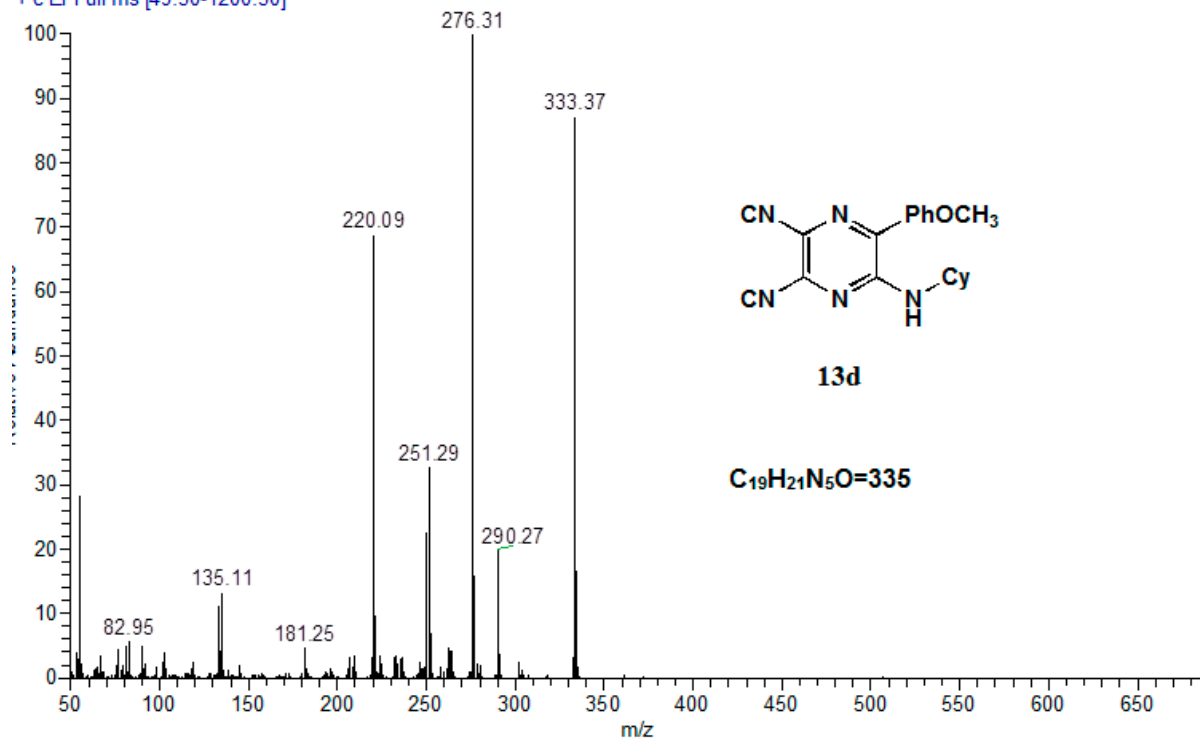

L 210616114706 #106 RT: 5.09 AV: 1 NL: 4.87E7  
T: + c EI Full ms [49.50-1200.50]

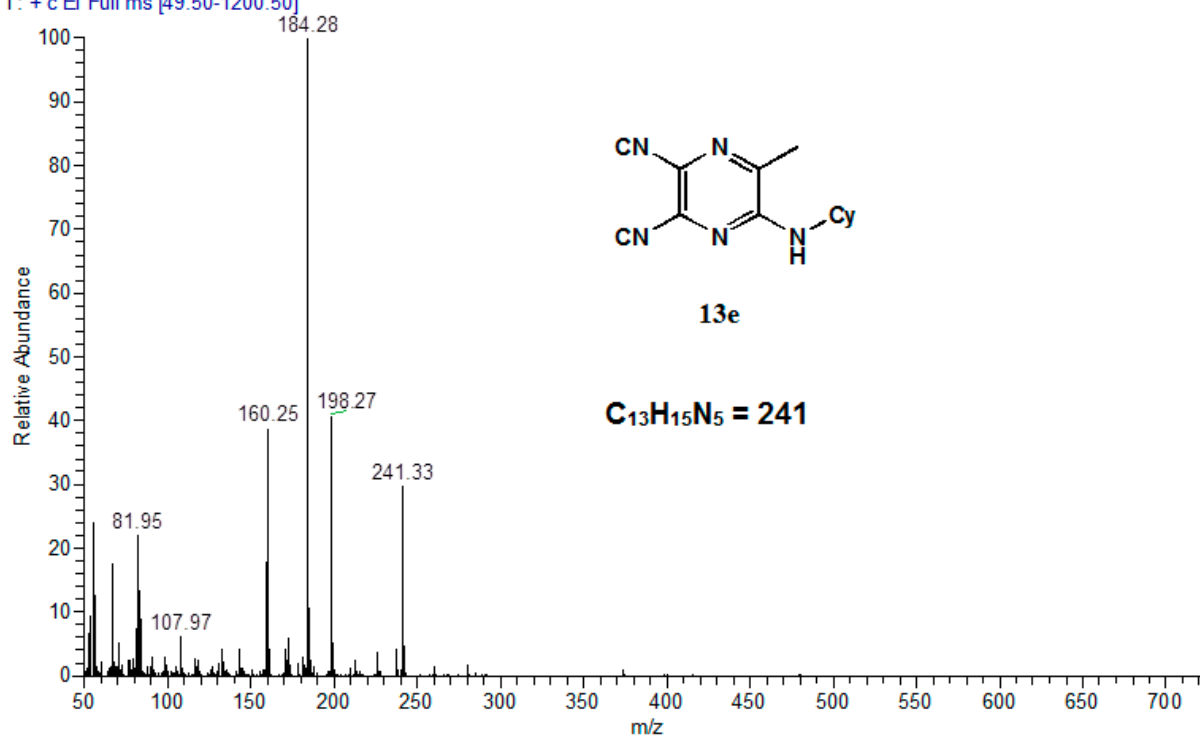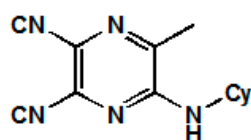

13e

$C_{13}H_{15}N_5 = 241$

CYBnA #137 RT: 6.59 AV: 1 NL: 1.22E7  
T: + c EI Full ms [49.50-1200.50]

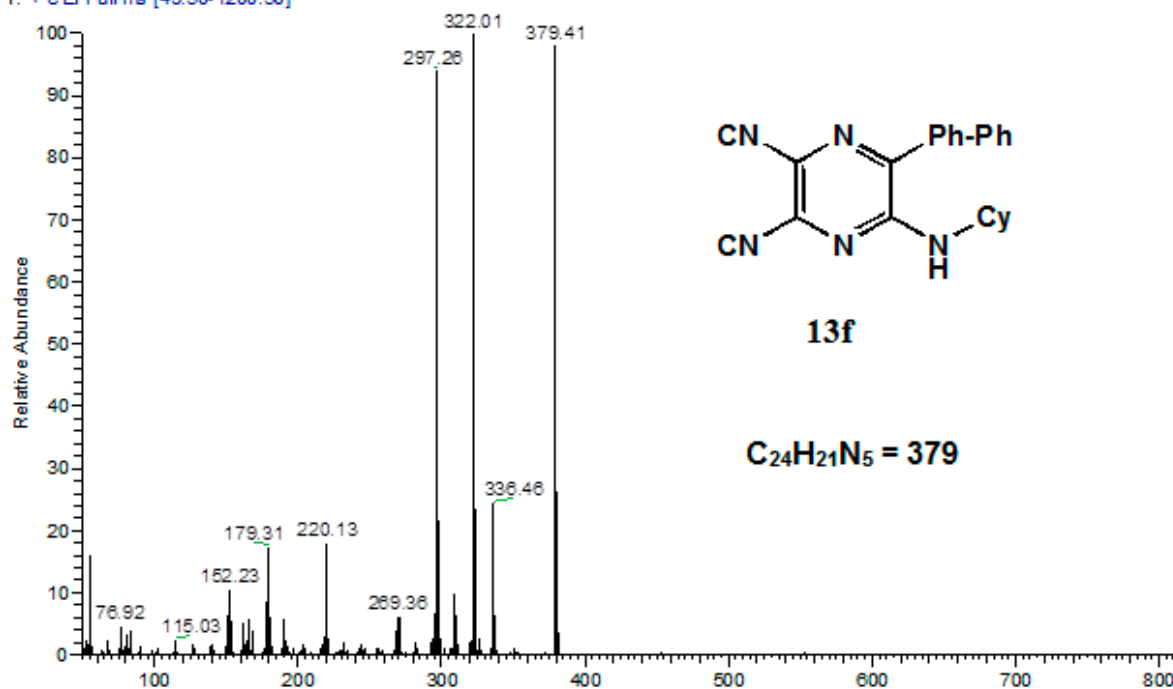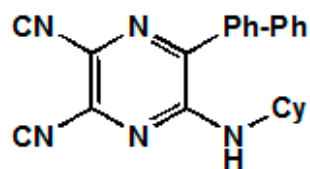

13f

$C_{24}H_{21}N_5 = 379$



CYPF #102 RT: 4.91 AV: 1 NL: 5.90E7  
T: + c EI Full ms [49.50-1200.50]

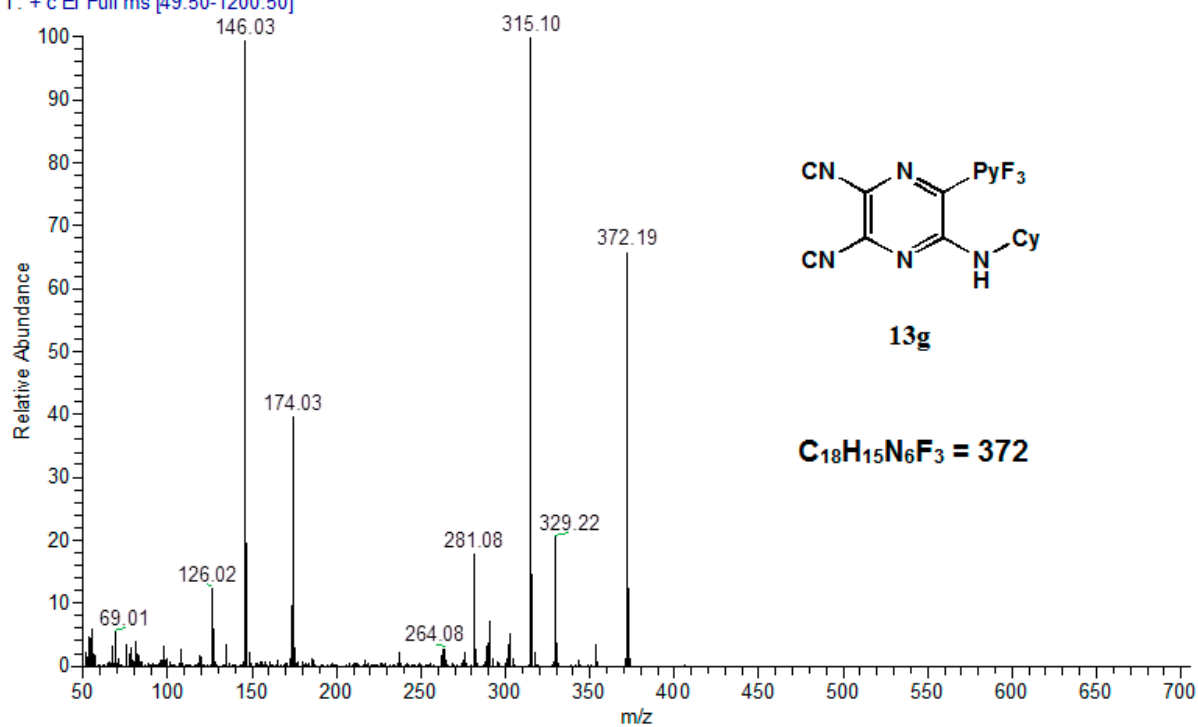

DMtbCH3 #64 RT: 3.06 AV: 1 NL: 1.62E7  
T: + c EI Full ms [49.50-1200.50]

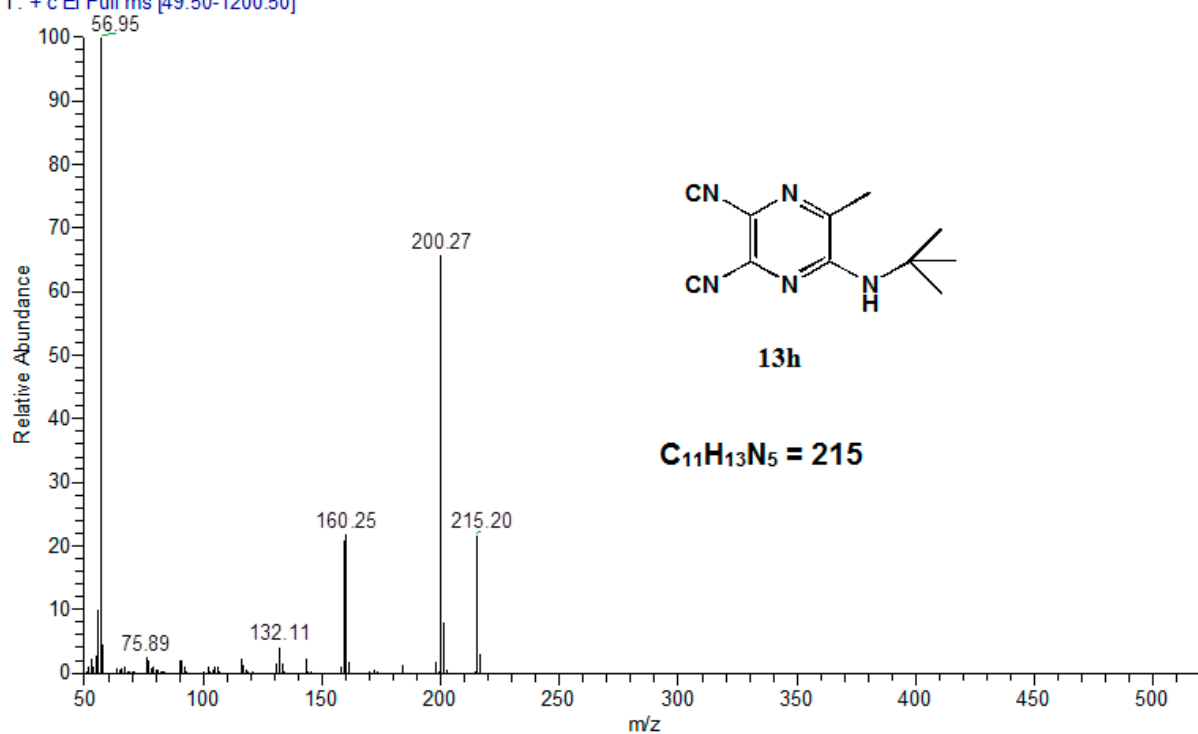

B-tb 210704130959 #66 RT: 3.16 AV: 1 NL: 8.27E6  
T: + c EI Full ms [49.50-1200.50]

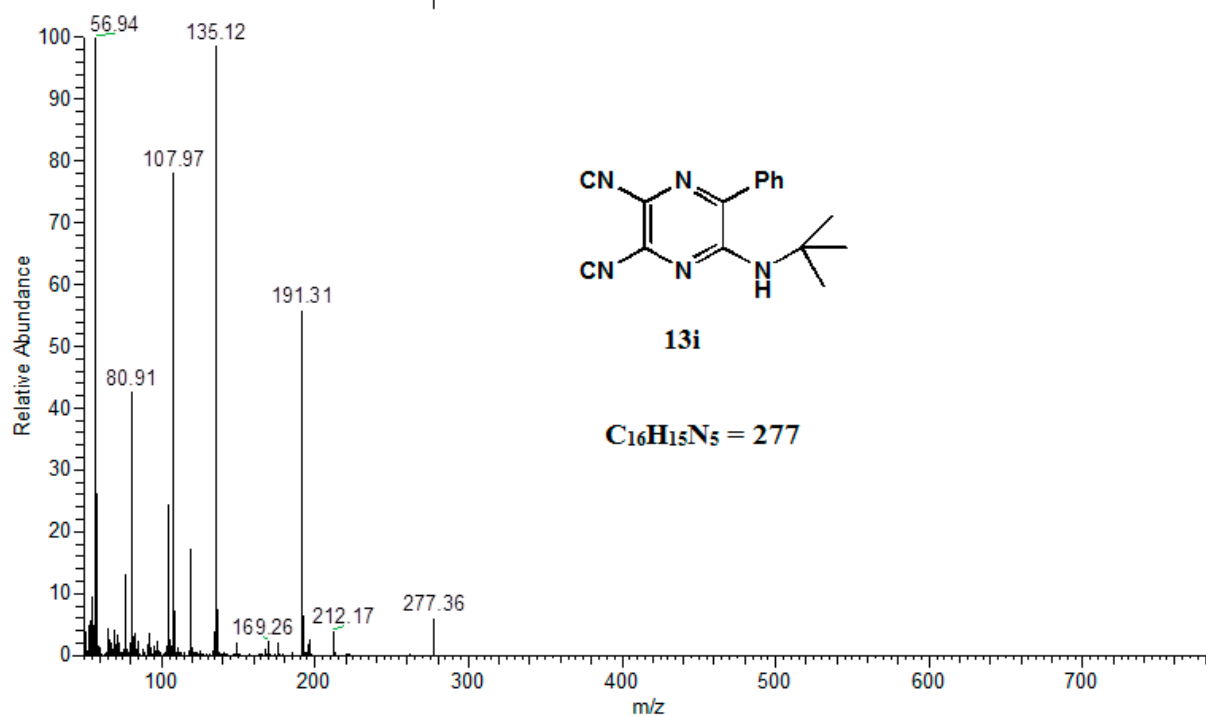

F11 #206 RT: 9.95 AV: 1 NL: 3.67E7  
T: + c EI Full ms [49.50-1200.50]

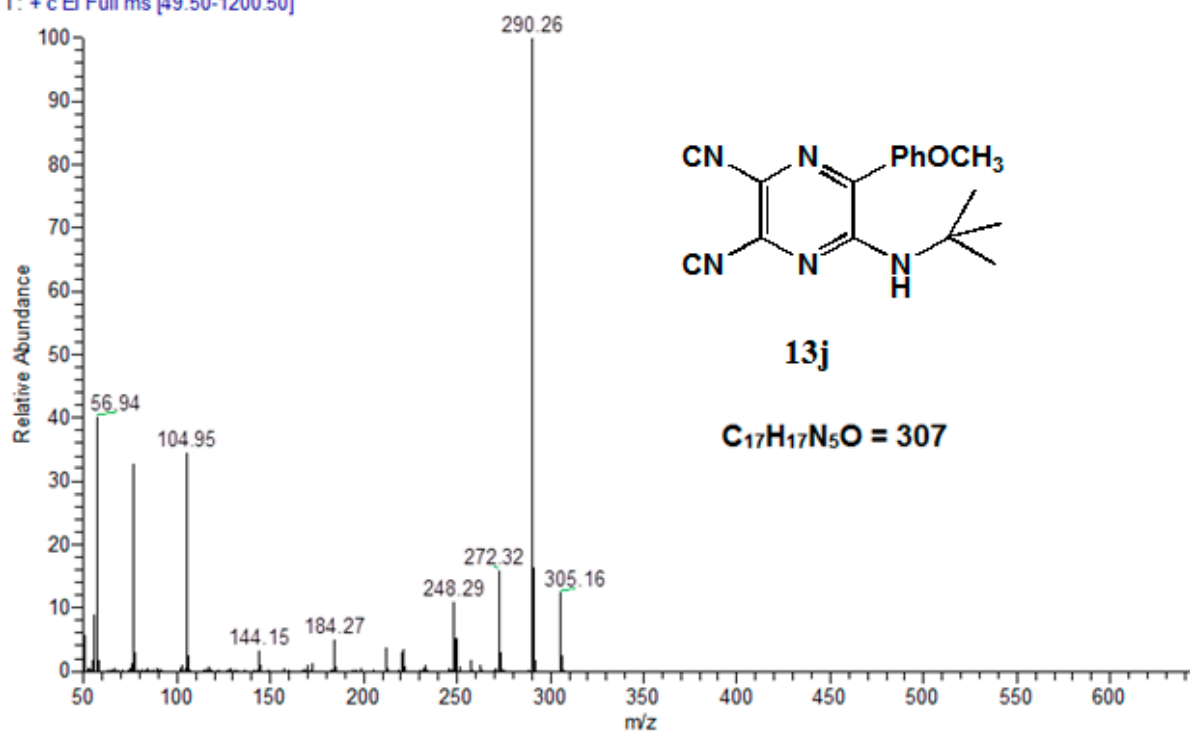

7t-b #118 RT: 5.68 AV: 1 NL: 6.69E7  
T: + c EI Full ms [49.50-1200.50]

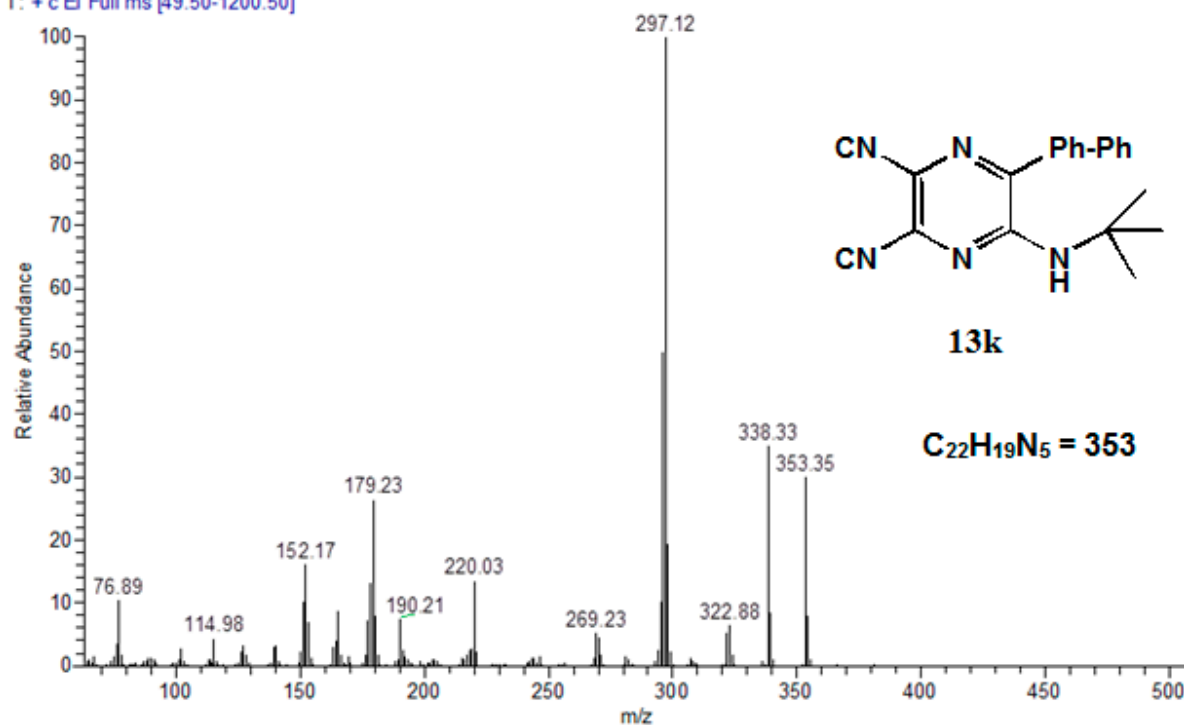

P-CLneo #180 RT: 8.70 AV: 1 NL: 9.47E7  
T: + c EI Full ms [49.50-1200.50]

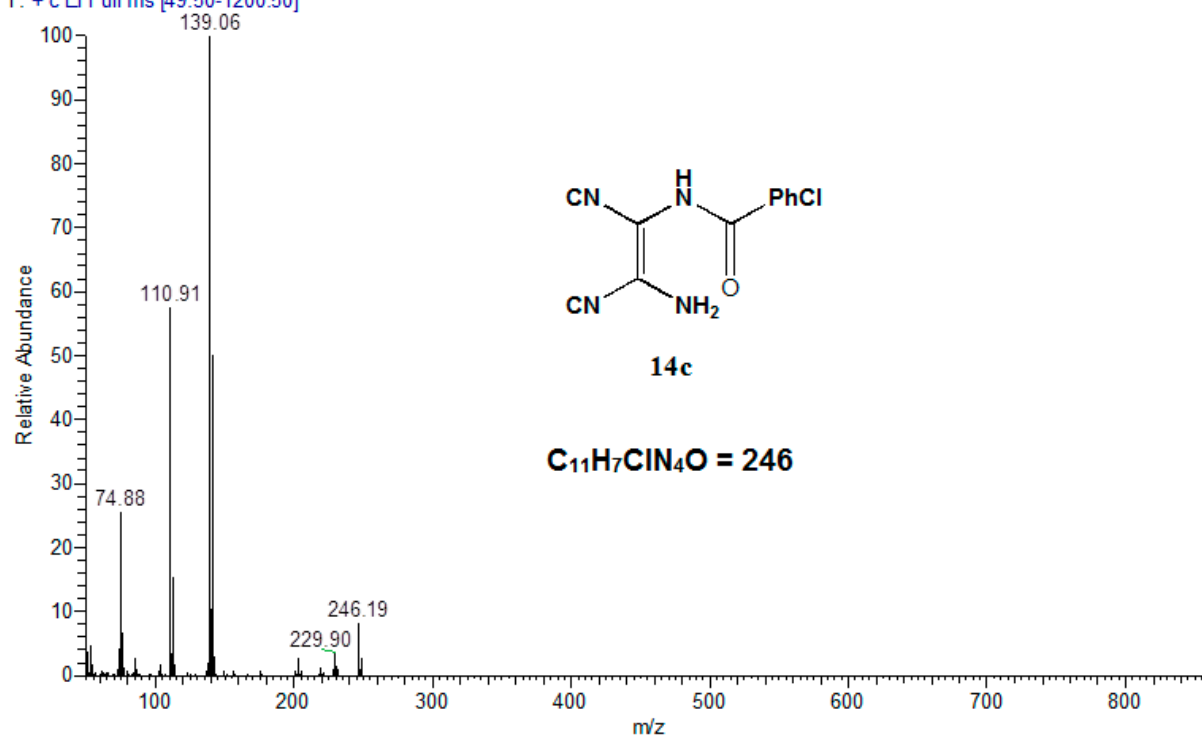

TbOMe-S45 #124 RT: 5.97 AV: 1 NL: 7.66E7  
T: + c EI Full ms [49.50-1200.50]

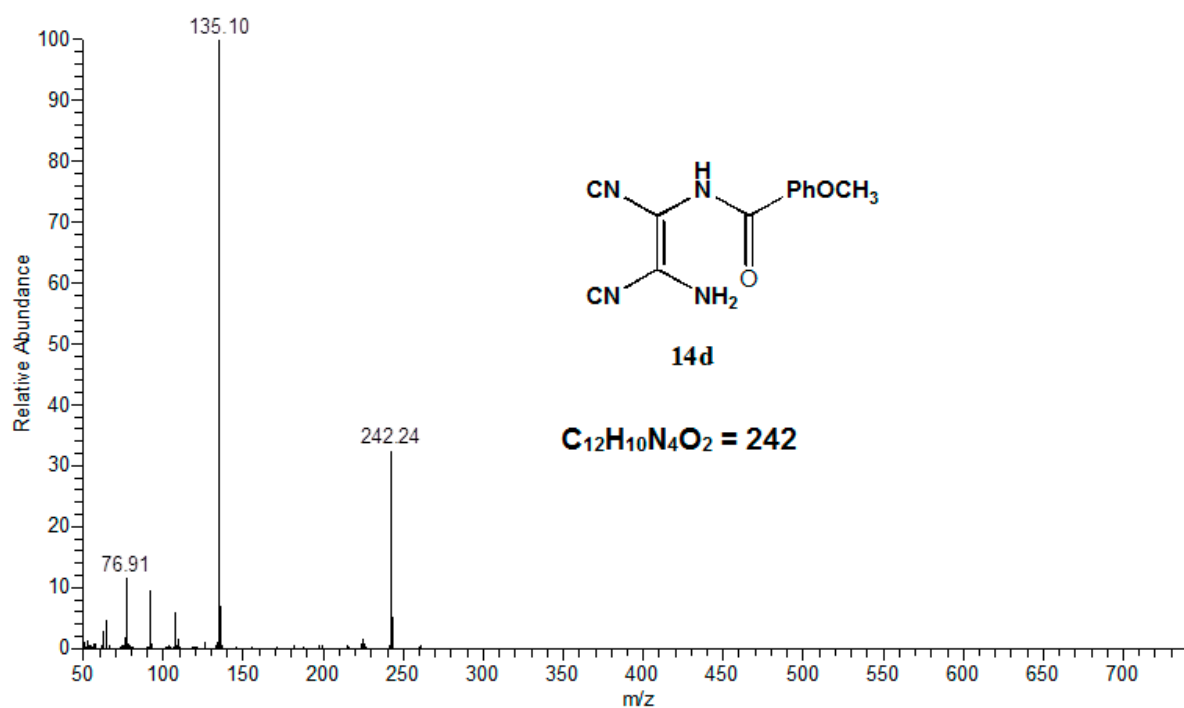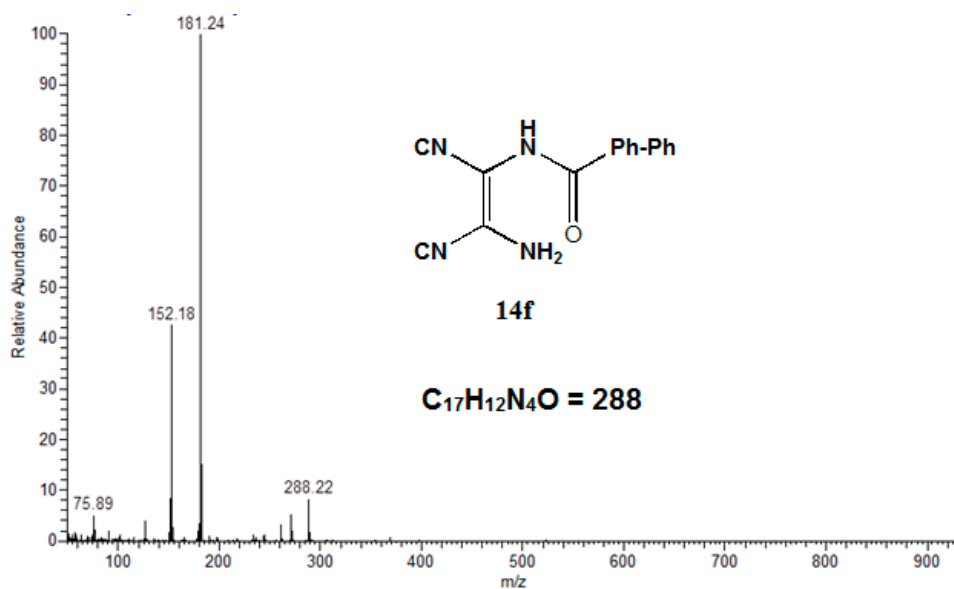

## HRMS

HRMS-PyCv-mass1 #173 RT: 6.24 AV: 1 NL: 8.34E5  
T: + c EI Full ms [269.50-320.50]

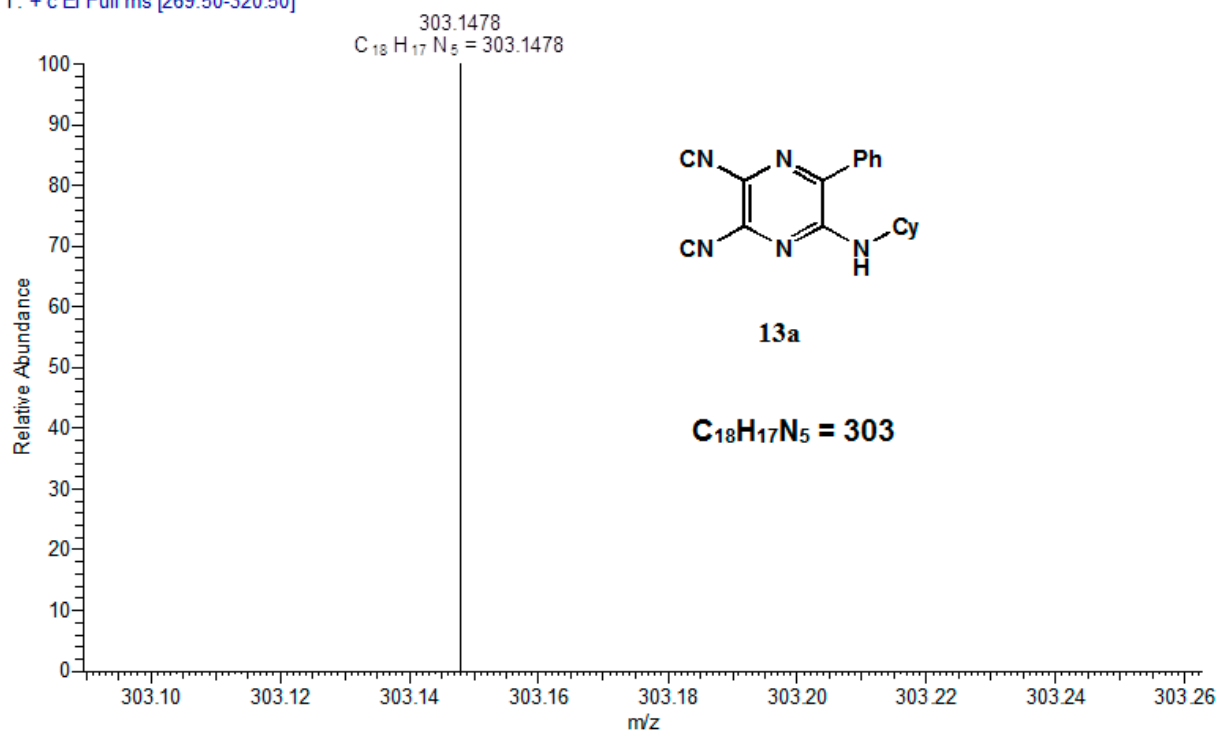

HRMS-MCY-cmass1#89 RT: 7.62 AV: 1 NL: 2.60E2  
T: + c EI Full ms [269.50-350.50]

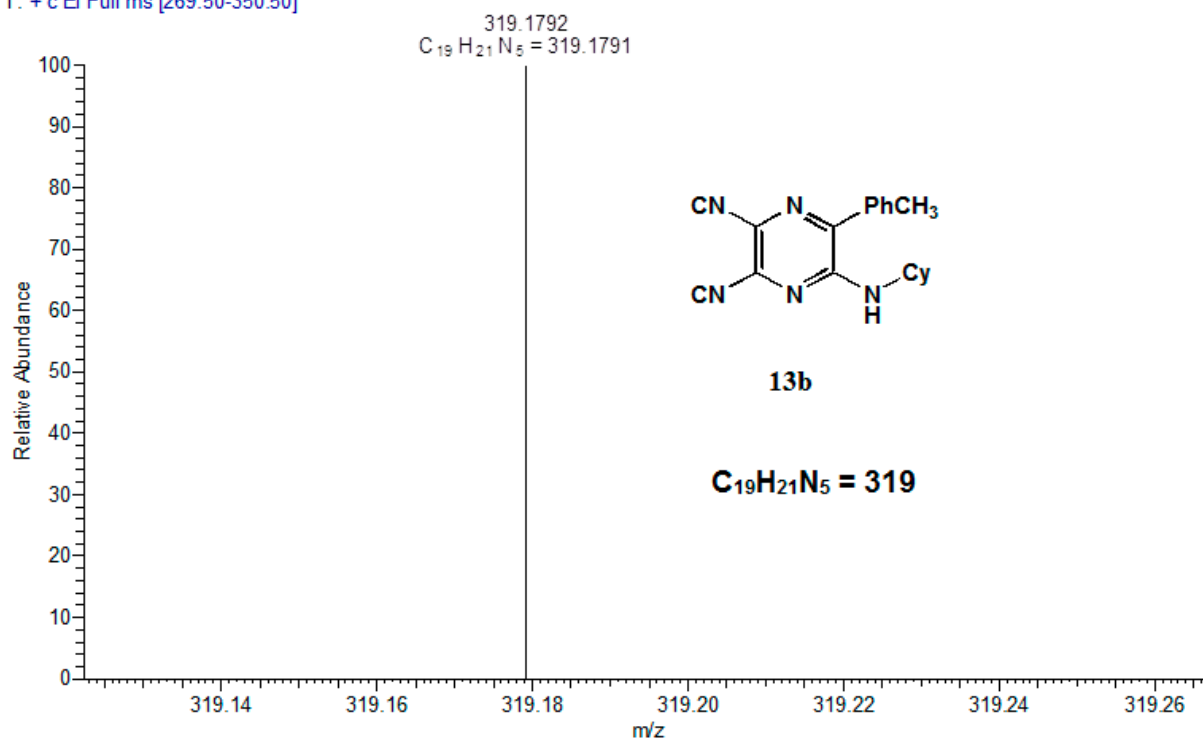

HRMS-PhCl-cmass1#84 RT: 6.41 AV: 1 NL: 7.22E3  
T: + c EI Full ms [299.50-370.50]

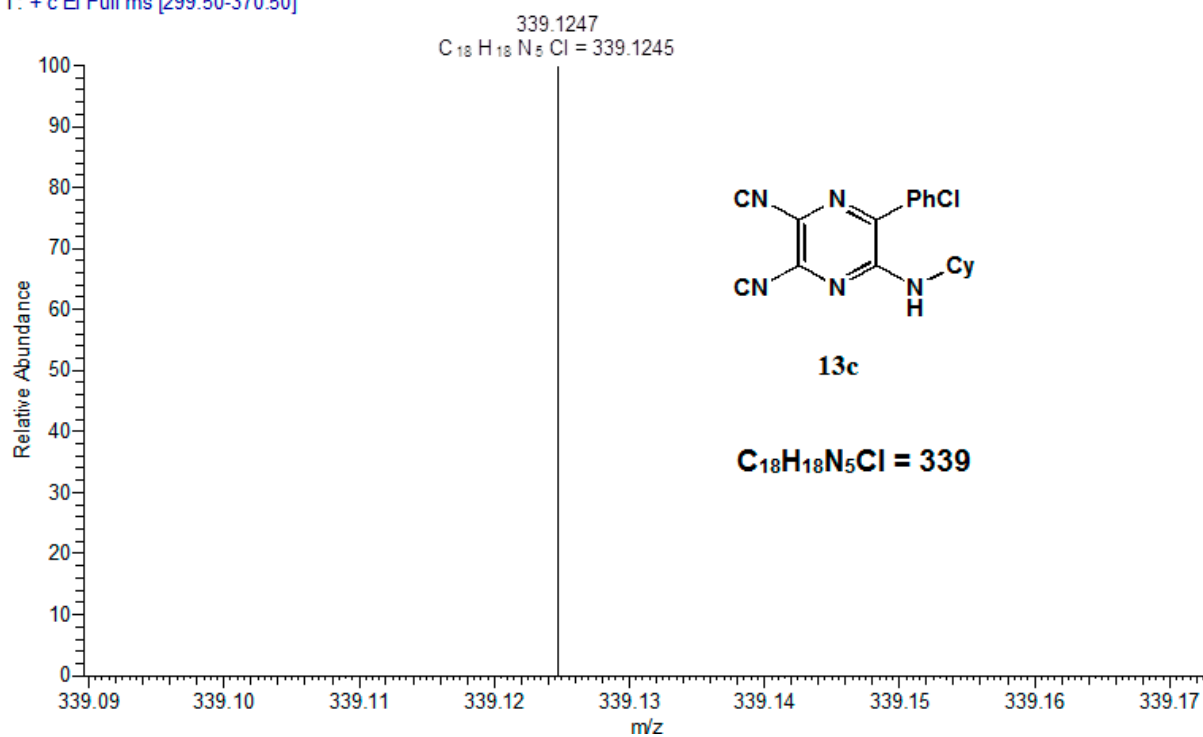

HRMS-CyOMe-cmass1 #12 RT: 3.90 AV: 1 NL: 3.43E3  
T: + c EI Full ms [299.50-370.50]

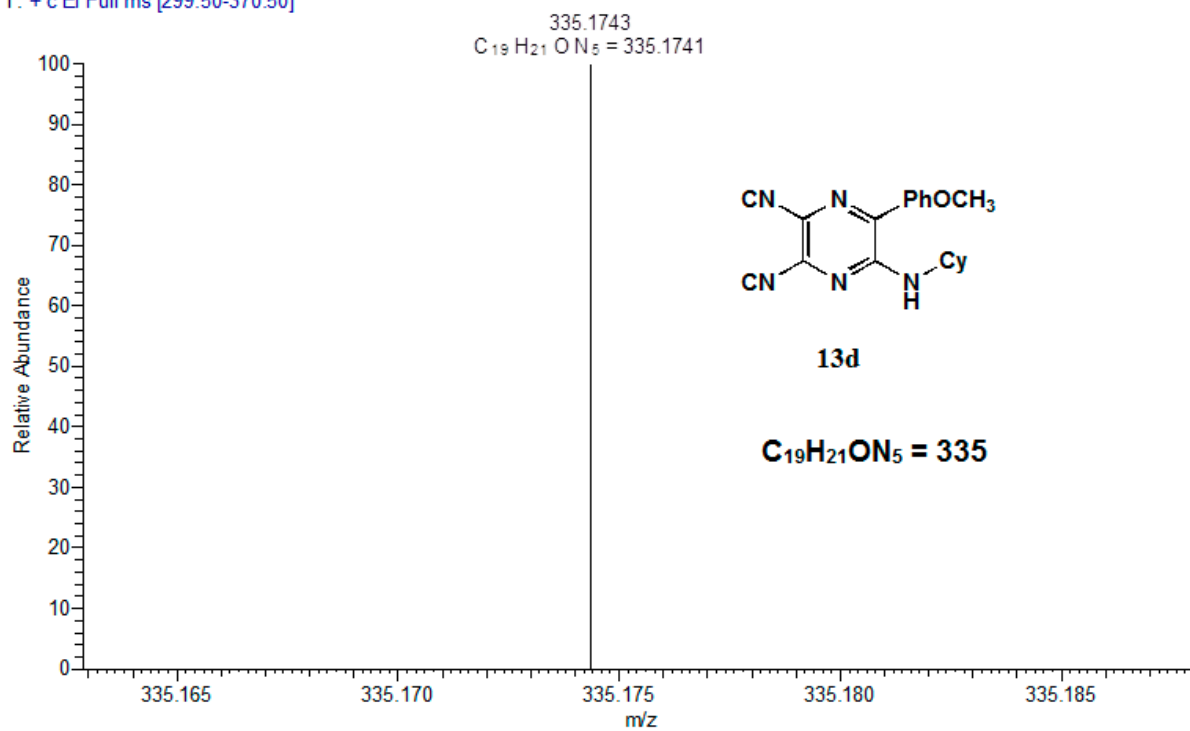

HRMS-DC-mass1 #9 RT: 2.76 AV: 1 NL: 1.36E4  
T: + c EI Full ms [199.50-270.50]

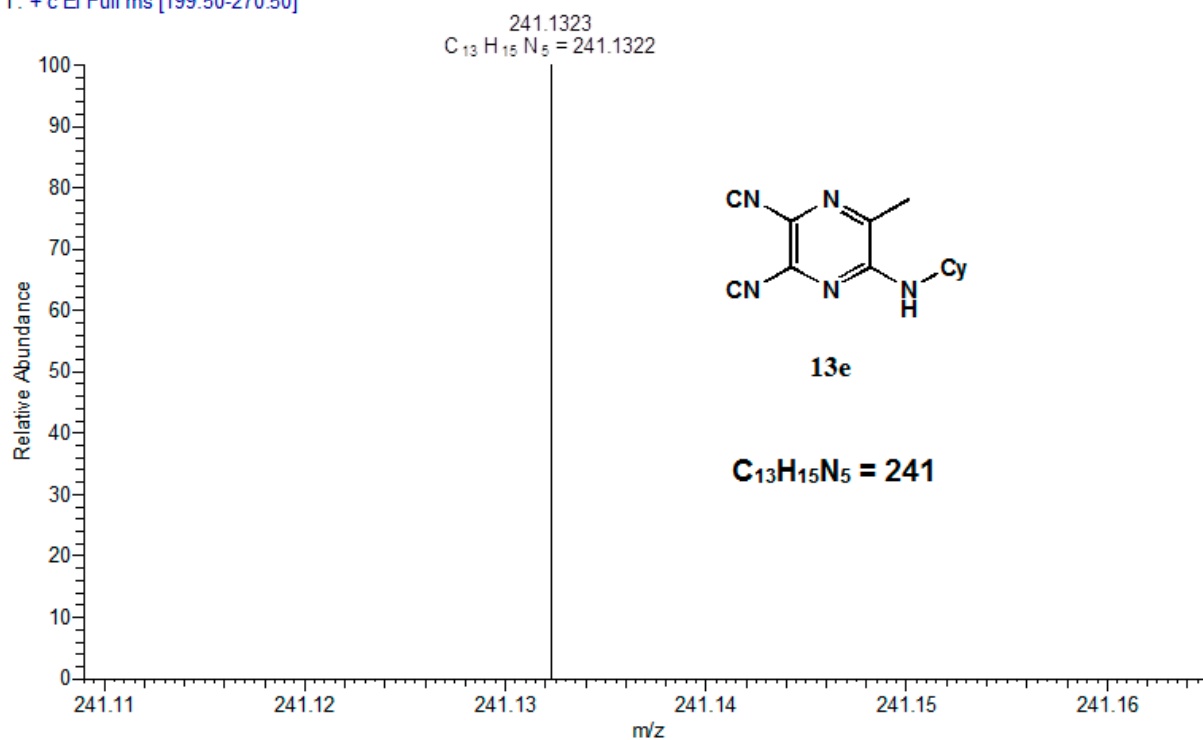

HRMS-3BPhy-mass1 #98 RT: 6.61 AV: 1 NL: 3.00E5  
T: + c EI Full ms [339.50-410.50]

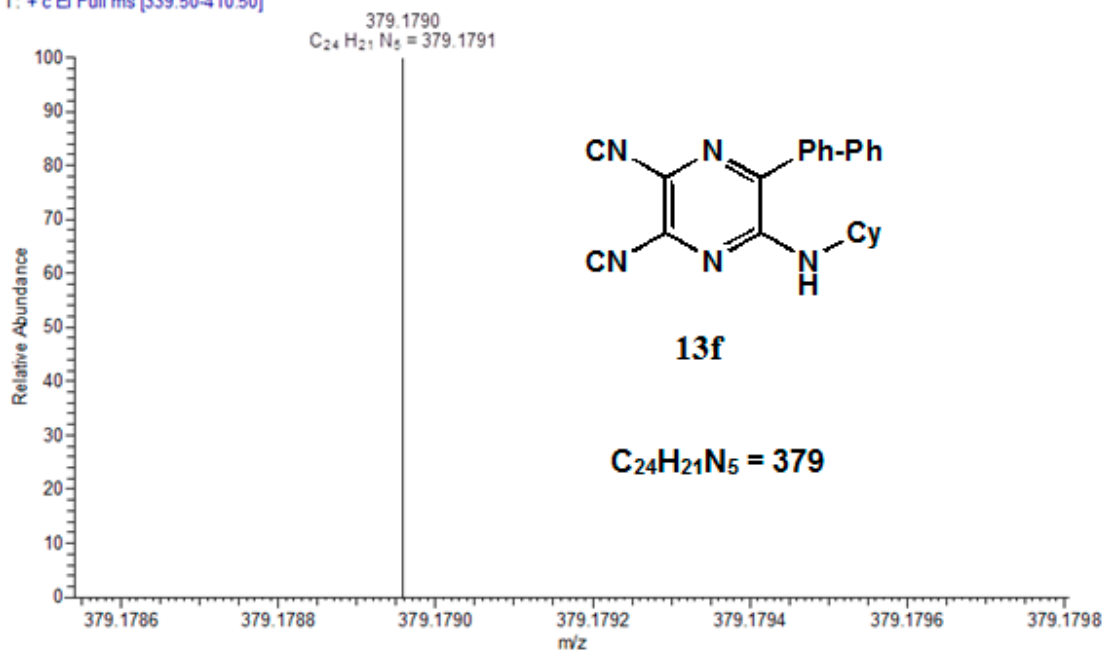



HRMS-F2-cmass1#12 RT: 2.84 AV: 1 NL: 3.14E5  
T: + c EI Full ms [339.50-410.50]

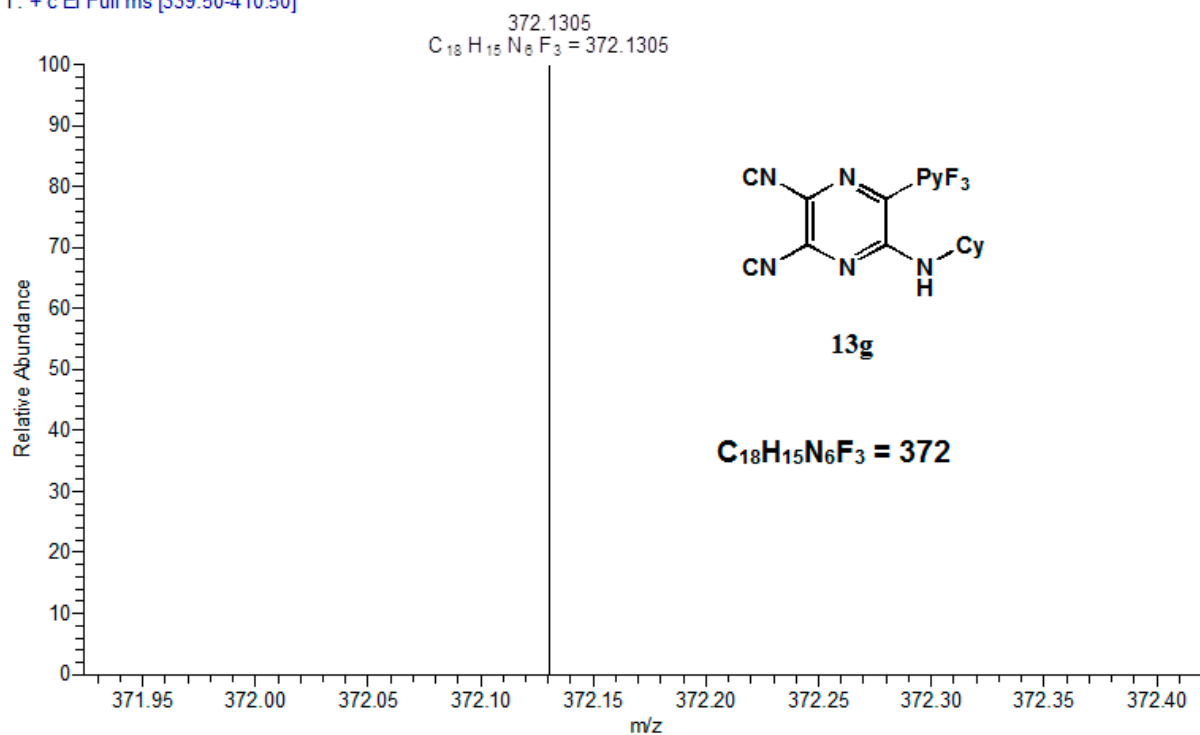

HRMS-303P3-cmass1#31 RT: 3.49 AV: 1 NL: 4.38E6  
T: + c EI Full ms [189.50-250.50]

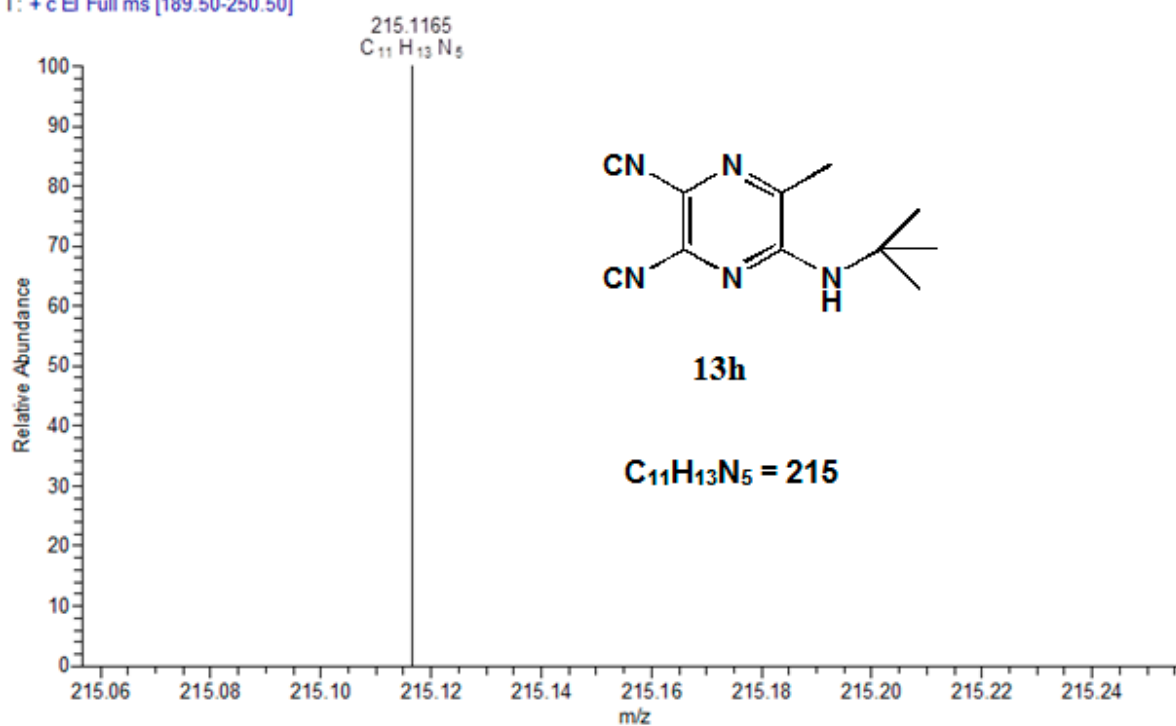

HRMS-BTb-mass1 #20 RT: 2.07 AV: 1 NL: 4.13E2  
T: + c EI Full ms [239.50-310.50]

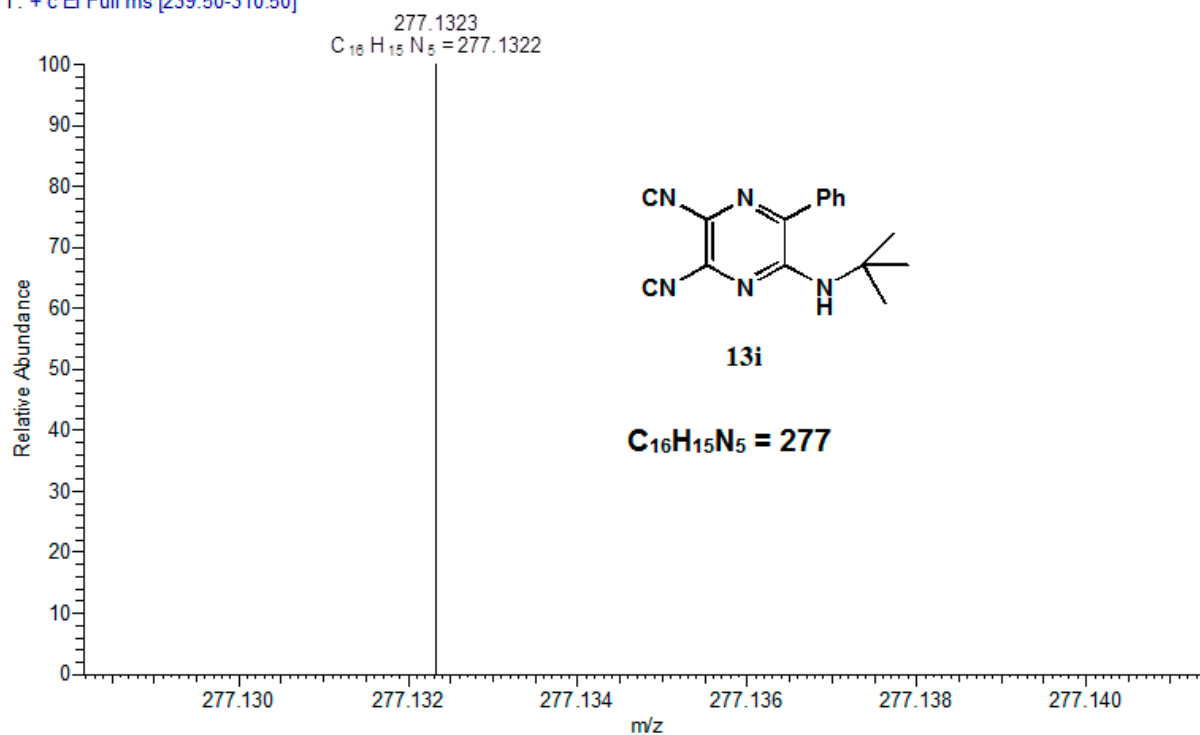

HRMS-TbOMe-mass1 #110 RT: 8.76 AV: 1 NL: 6.74E2  
T: + c EI Full ms [269.50-350.50]

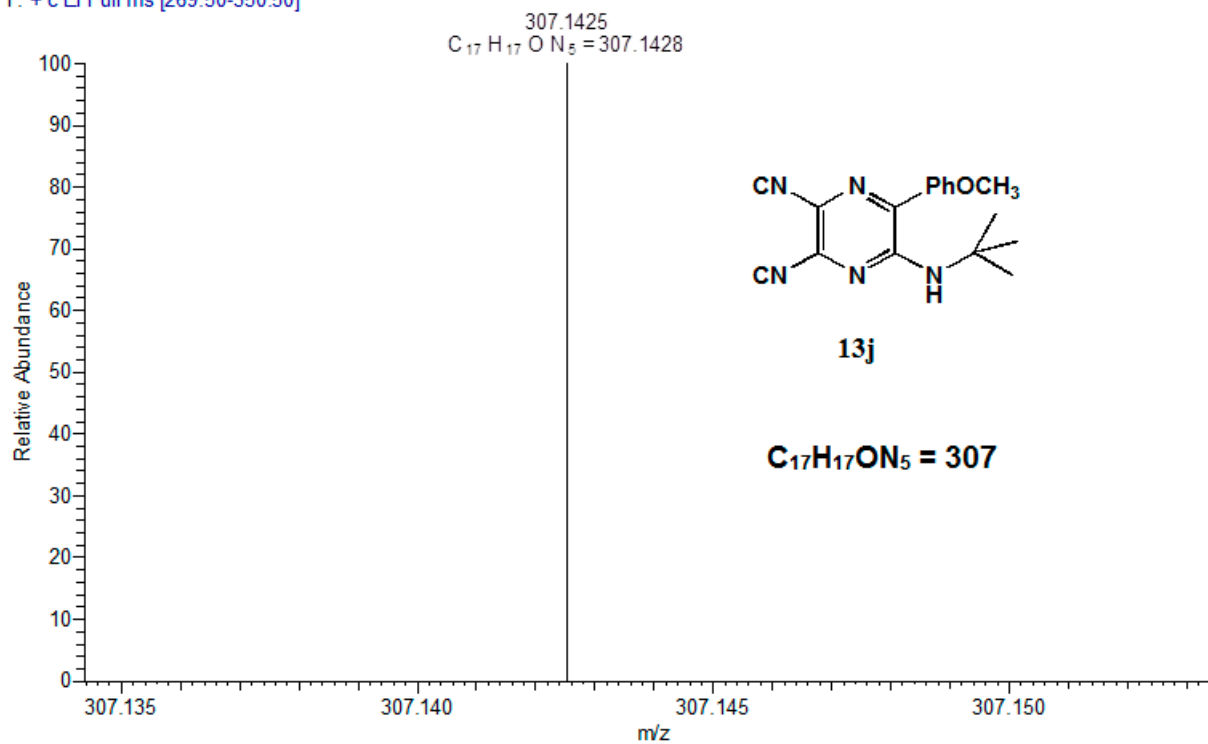

HRMS-7tb-cmass1#12 RT: 3.87 AV: 1 NL: 8.66E3  
T: + c EI Full ms [309.50-390.50]

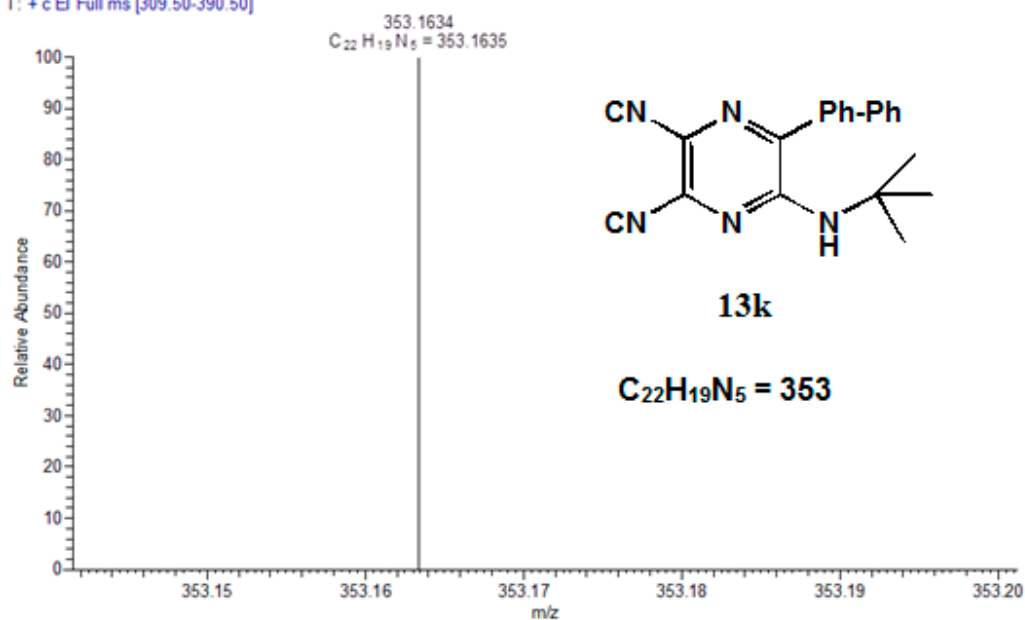

HRMS-PCInw #58 RT: 4.86 AV: 1 NL: 7.32E3  
T: + c EI Full ms [199.50-290.50]

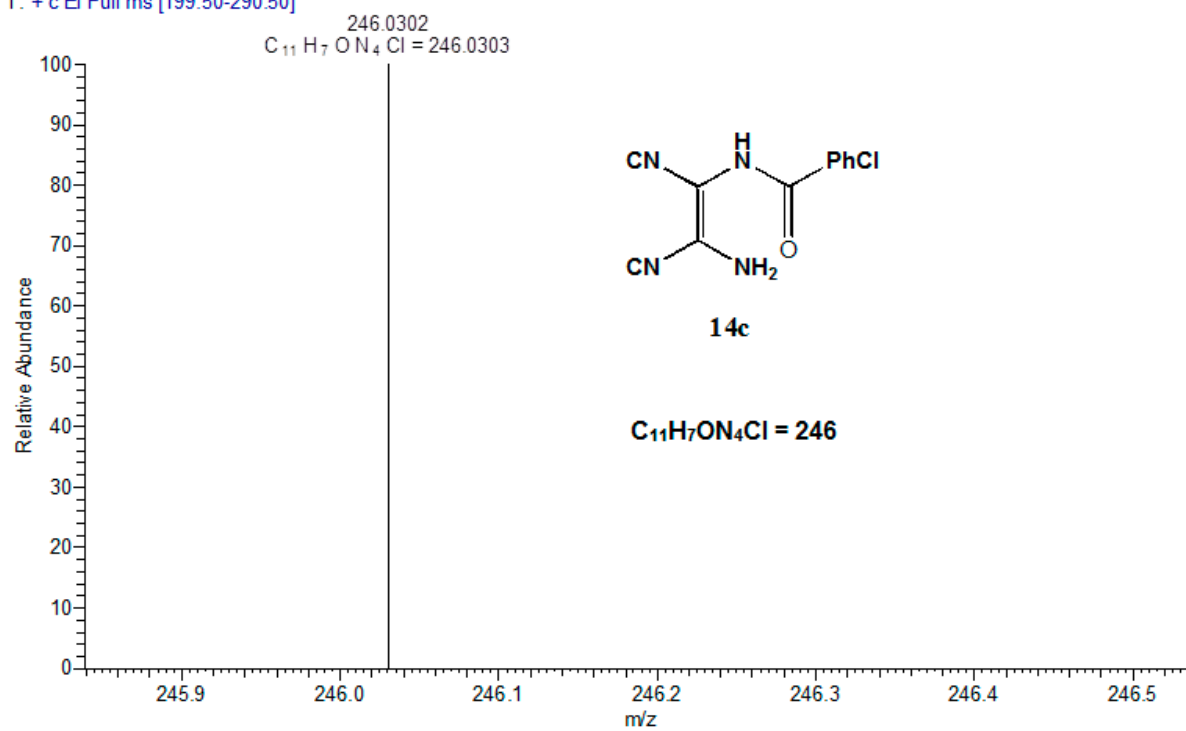

HRMS-TbOMe-S45-cmass1#36 RT: 3.92 AV: 1 NL: 1.39E3  
T: + c EI Full ms [199.50-290.50]

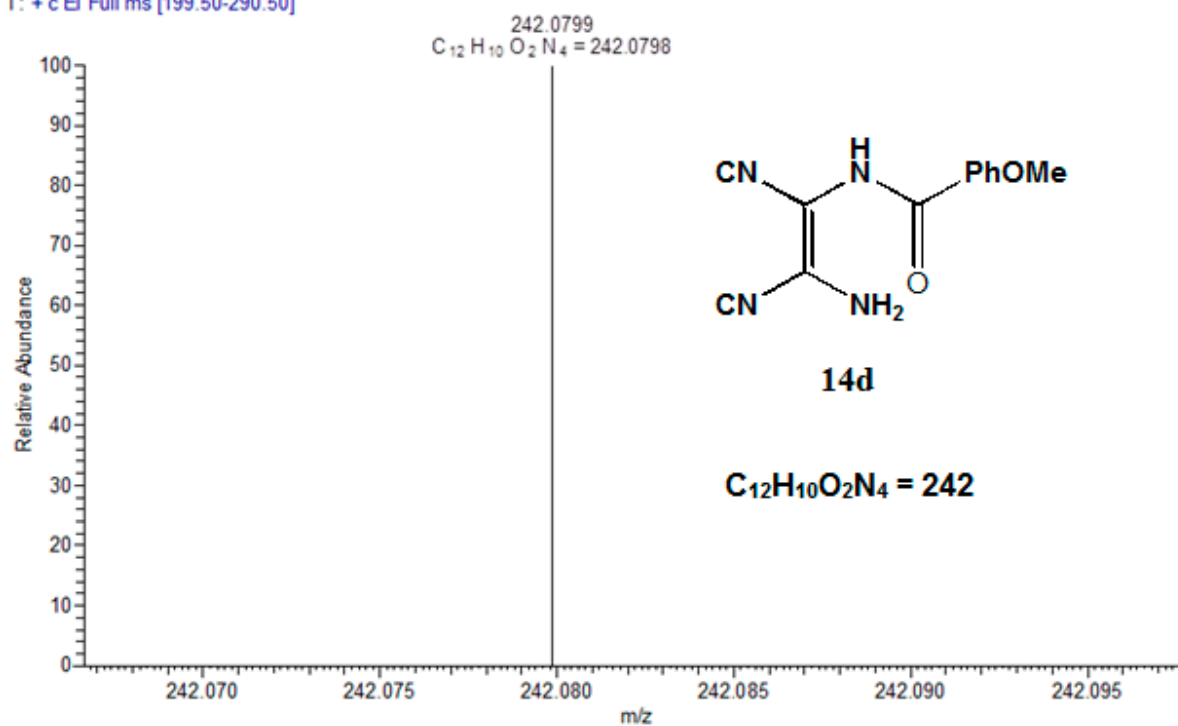

HRMS-BPCy-S-mass1#78 RT: 8.11 AV: 1 NL: 2.53E4  
T: + c EI Full ms [249.50-320.50]

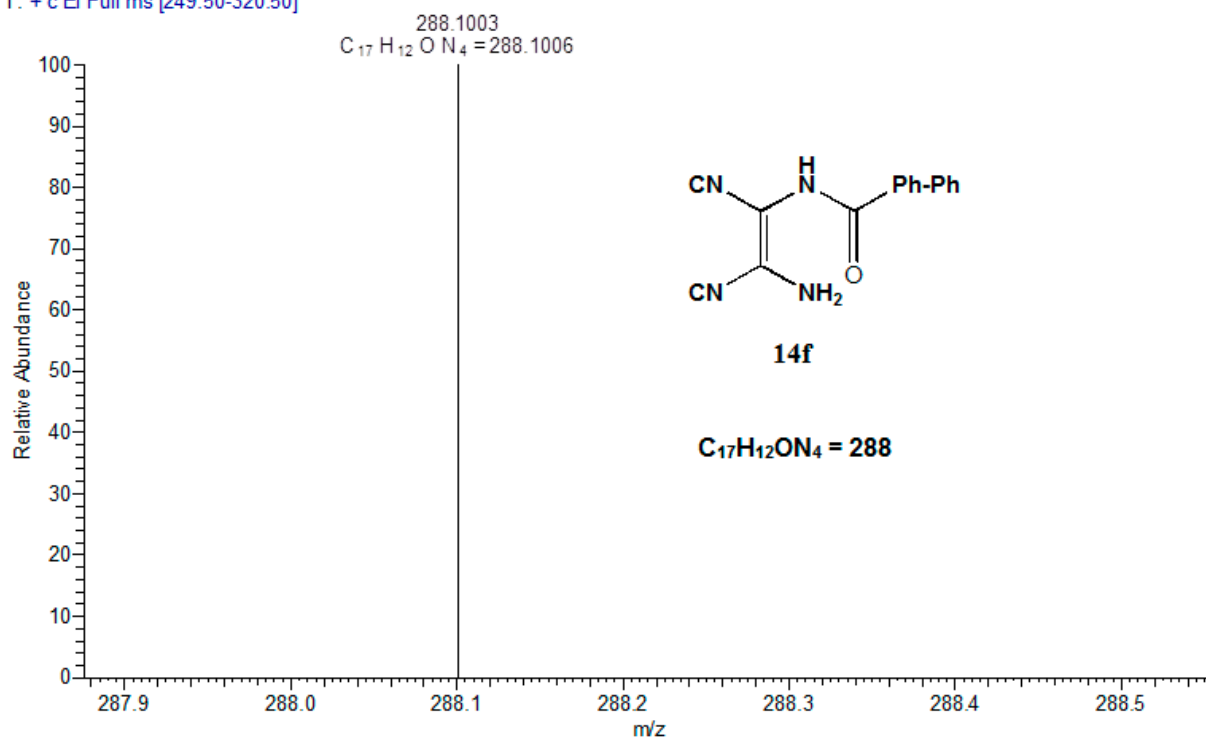

## Single crystal X- diffraction analysis of 13a, 13e, 13f & 13k

### Experimental

The single crystal data collection was made either on Bruker X8 prospector diffractometer by Cu-K $\alpha$  radiation or on Rigaku Rapid II diffractometer by Mo-K $\alpha$  radiation at room temperature. In the former case the reflection frames were integrated with the Bruker SAINT Software package using a narrow-frame algorithm. Finally, the structure was solved using the Bruker SHELXTL Software Package and refined using SHELXL-2017/1. The data collected using the Rigaku diffractometer was processed by 'Crystalclear' software package. The structure was then solved by direct methods by 'CrystalStructure' crystallographic software package and the refinement was performed using SHELXL-2017/1. All non-hydrogen atoms were refined anisotropically.

The summary of the various crystallographic parameters of the 5 crystal samples discussed in the present study are provided in the **Table S1** & **Table S2**.

**Table S1.** Summary on the nature and various crystallographic parameters of 13a, 13e, 13f & 13k

| Crystal sample              | 13a                                                                                                                                 | 13e                                                                                                                                 |
|-----------------------------|-------------------------------------------------------------------------------------------------------------------------------------|-------------------------------------------------------------------------------------------------------------------------------------|
| Chemical formula            | <u>C<sub>18</sub>H<sub>17</sub>N<sub>5</sub></u>                                                                                    | <u>C<sub>13</sub>H<sub>15</sub>N<sub>5</sub></u>                                                                                    |
| $M_r$                       | <u>303.36</u>                                                                                                                       | <u>241.30</u>                                                                                                                       |
| Crystal system, space group | <u>Monoclinic, <math>P2_1/c</math></u>                                                                                              | <u>Orthorhombic, <math>Pnma</math></u>                                                                                              |
| Temperature (K)             | <u>296</u>                                                                                                                          | <u>296</u>                                                                                                                          |
| $a, b, c$ (Å)               | <u>12.5902 (4), 7.3148 (3), 18.7251 (7)</u>                                                                                         | <u>22.2572 (18), 6.7423 (6), 8.8558 (7)</u>                                                                                         |
| $\alpha, \beta, \gamma$ (°) | 90, <u>106.991 (2)</u> , 90                                                                                                         | <u>90, 90, 90</u>                                                                                                                   |
| $V$ (Å <sup>3</sup> )       | <u>1649.21 (11)</u>                                                                                                                 | <u>1328.94 (19)</u>                                                                                                                 |
| $Z$                         | <u>4</u>                                                                                                                            | <u>4</u>                                                                                                                            |
| Radiation type              | <u>Cu <math>K\alpha</math></u>                                                                                                      | <u>Cu <math>K\alpha</math></u>                                                                                                      |
| $\mu$ (mm <sup>-1</sup> )   | <u>0.61</u>                                                                                                                         | <u>0.62</u>                                                                                                                         |
| Crystal size (mm)           | <u>0.34 × 0.27 × 0.12</u>                                                                                                           | <u>0.20 × 0.20 × 0.10</u>                                                                                                           |
| Diffractometer              | <u>Bruker APEX-II CCD</u>                                                                                                           | <u>Bruker APEX-II CCD</u>                                                                                                           |
| Absorption correction       | <u>Multi-scan</u><br><u>SADABS2016/2 - Bruker</u><br><u>AXS area detector</u><br><u>scaling and absorption</u><br><u>correction</u> | <u>Multi-scan</u><br><u>SADABS2016/2 - Bruker</u><br><u>AXS area detector</u><br><u>scaling and absorption</u><br><u>correction</u> |

|                                                                          |                           |                           |
|--------------------------------------------------------------------------|---------------------------|---------------------------|
| $T_{\min}, T_{\max}$                                                     | <u>0.83, 0.92</u>         | <u>0.88, 0.94</u>         |
| No. of measured, independent & observed [ $I > 2\sigma(I)$ ] reflections | <u>18753, 2907, 2085</u>  | <u>5714, 1269, 1033</u>   |
| $R_{\text{int}}$                                                         | <u>0.061</u>              | <u>0.046</u>              |
| $(\sin \theta/\lambda)_{\max}$ ( $\text{\AA}^{-1}$ )                     | 0.596                     | 0.595                     |
| $R[F^2 > 2\sigma(F^2)], wR(F^2), S$                                      | <u>0.048, 0.144, 1.01</u> | <u>0.058, 0.181, 1.10</u> |
| No. of reflections                                                       | <u>2907</u>               | <u>1269</u>               |
| No. of parameters                                                        | <u>208</u>                | <u>110</u>                |
| H-atom treatment                                                         | <u>Constrained</u>        | <u>Mixed</u>              |
| $\Delta\rho_{\max}, \Delta\rho_{\min}$ ( $\text{e \AA}^{-3}$ )           | <u>0.11, -0.22</u>        | <u>0.26, -0.20</u>        |

**Table S2.** Summary on the nature and various crystallographic parameters of **13f** & **13k**

| Crystal sample                       | <b>13f</b>                                                                                     | <b>13k</b>                                                                                     |
|--------------------------------------|------------------------------------------------------------------------------------------------|------------------------------------------------------------------------------------------------|
| Chemical formula                     | $\text{C}_{24}\text{H}_{21}\text{N}_5$                                                         | $\text{C}_{22}\text{H}_{19}\text{N}_5$                                                         |
| $M_r$                                | 379.46                                                                                         | 353.42                                                                                         |
| Crystal system, space group          | Monoclinic, $P2_1/n$                                                                           | Monoclinic, $P2_1/c$                                                                           |
| Temperature (K)                      | 296                                                                                            | 296                                                                                            |
| $a, b, c$ ( $\text{\AA}$ )           | 11.8808 (4), 10.5852 (4), 17.3946 (7)                                                          | 12.4754 (9), 10.2482 (7), 15.7377 (12)                                                         |
| $\alpha, \beta, \gamma$ ( $^\circ$ ) | 90, 106.785 (3), 90                                                                            | 90, 104.935 (4), 90                                                                            |
| $V$ ( $\text{\AA}^3$ )               | 2094.36 (14)                                                                                   | 1944.1 (2)                                                                                     |
| $Z$                                  | 4                                                                                              | 4                                                                                              |
| Radiation type                       | Cu $K\alpha$                                                                                   | Cu $K\alpha$                                                                                   |
| $\mu$ ( $\text{mm}^{-1}$ )           | 0.58                                                                                           | 0.59                                                                                           |
| Crystal size (mm)                    | $0.22 \times 0.14 \times 0.11$                                                                 | $0.16 \times 0.15 \times 0.11$                                                                 |
| Diffractometer                       | Bruker <i>APEX-II</i> CCD                                                                      | Bruker <i>APEX-II</i> CCD                                                                      |
| Absorption correction                | Multi-scan<br><i>SADABS2016/2</i> - Bruker AXS area detector scaling and absorption correction | Multi-scan<br><i>SADABS2016/2</i> - Bruker AXS area detector scaling and absorption correction |
| $T_{\min}, T_{\max}$                 | 0.88, 0.93                                                                                     | 0.90, 0.94                                                                                     |

|                                                                               |                    |                    |
|-------------------------------------------------------------------------------|--------------------|--------------------|
| No. of measured,<br>independent & observed [ $I > 2\sigma(I)$ ] reflections   | 10564, 3621, 2460  | 17845, 3335, 2140  |
| $R_{\text{int}}$                                                              | 0.045              | 0.062              |
| $(\sin \theta/\lambda)_{\text{max}}$ ( $\text{\AA}^{-1}$ )                    | 0.596              | 0.596              |
| $R[F^2 > 2\sigma(F^2)]$ , $wR(F^2)$ , S                                       | 0.055, 0.165, 1.04 | 0.060, 0.194, 1.08 |
| No. of reflections                                                            | 3621               | 3335               |
| No. of parameters                                                             | 262                | 244                |
| H-atom treatment                                                              | Constrained        | Constrained        |
| $\Delta\rho_{\text{max}}$ , $\Delta\rho_{\text{min}}$ ( $\text{e \AA}^{-3}$ ) | 0.20, -0.18        | 0.16, -0.19        |

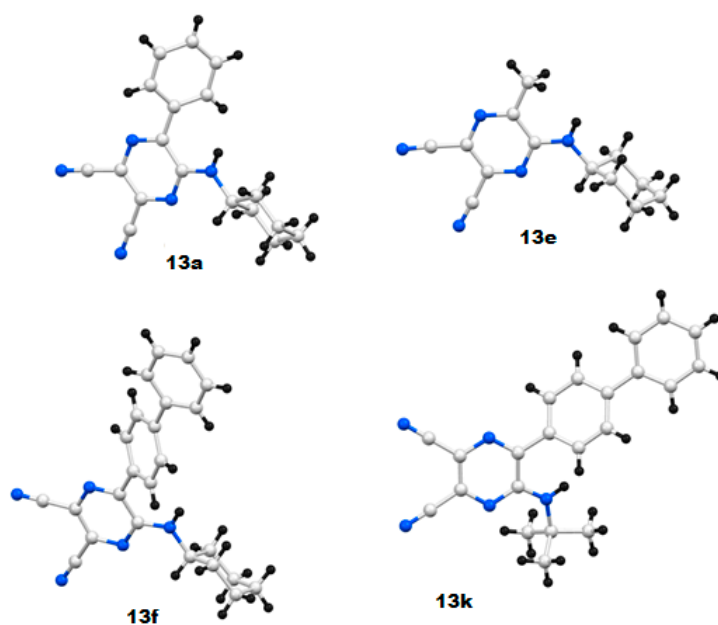

**Figure S1.** Crystal structure of **13a**, **13e**, **13f** and **13k**. Color code : gray-carbon; blue-nitrogen; yellow-fluorine and black-hydrogen.



### Supporting information

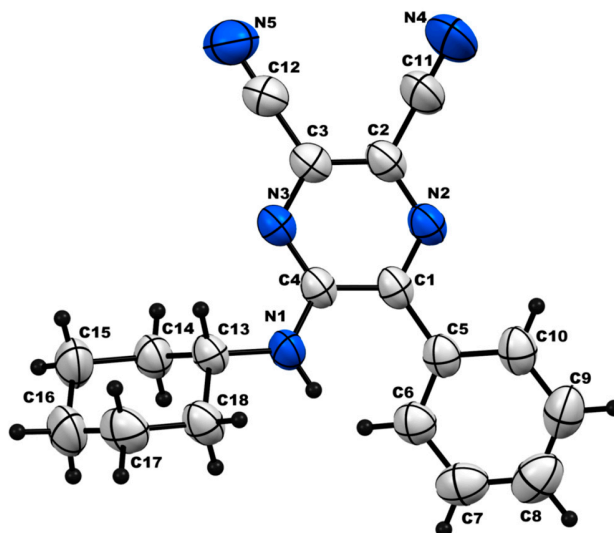

**Figure S2.** Crystal structure (Thermal ellipsoid representation) of **13a**.

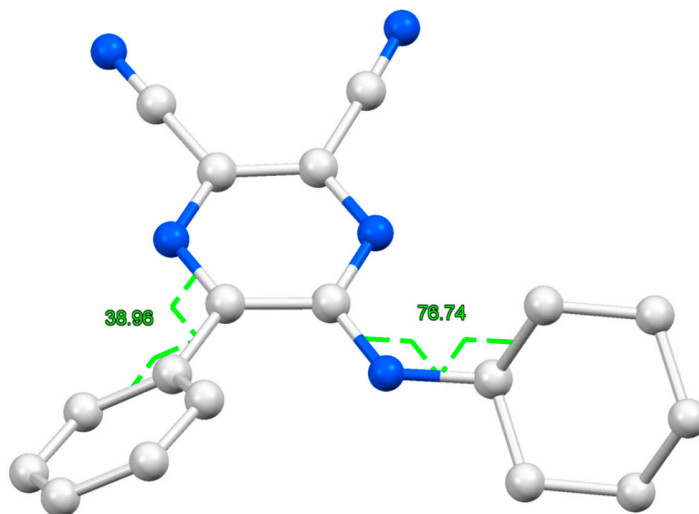

**Figure S3.** Orientation and the corresponding torsion angles of cyclohexyl and phenyl rings against the pyrazene ring in the crystal structure of the molecule **13a**.

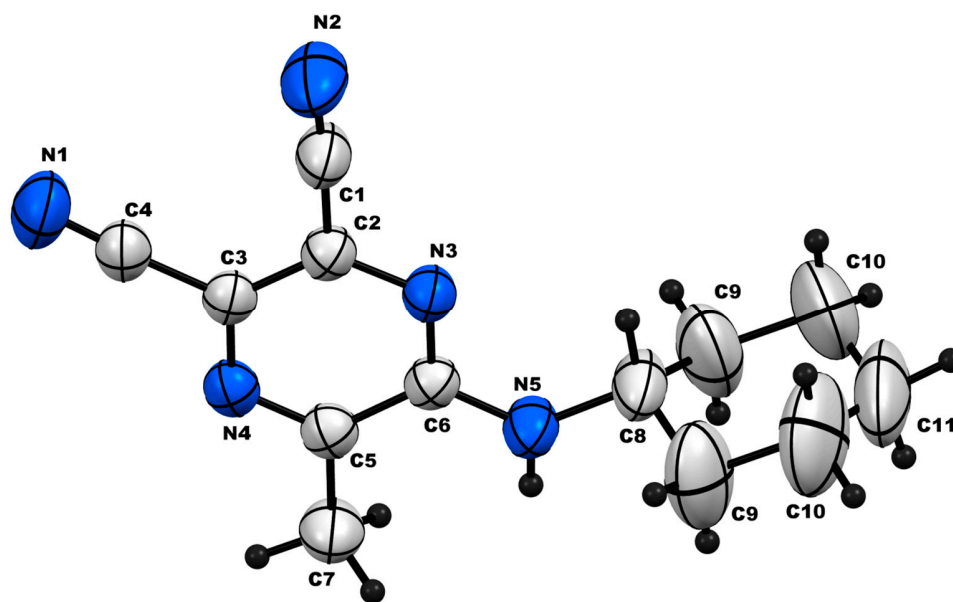

**Figure S4.** Crystal structure (Thermal ellipsoid representation) of **13e**.

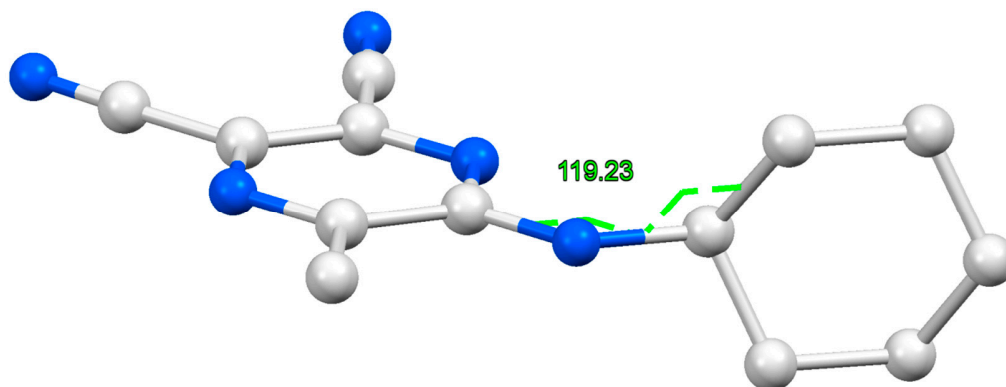

**Figure S5.** Orientation and the corresponding torsion angle of cyclohexyl ring against the pyrazene ring in the crystal structure of the molecule **13e**.

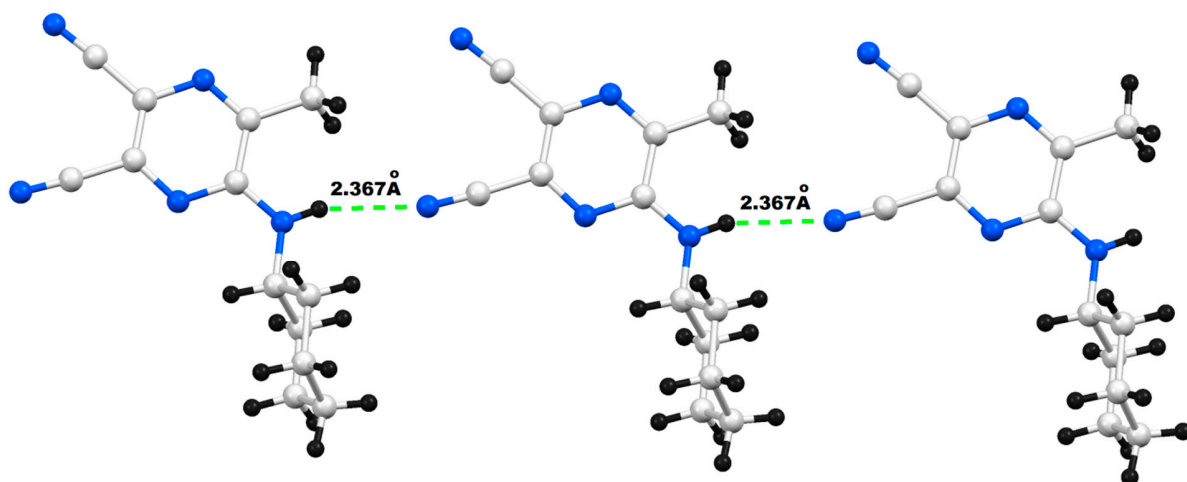

**Figure S6.** Intermolecular H-bonds experienced by **13e** molecules in its crystal network.

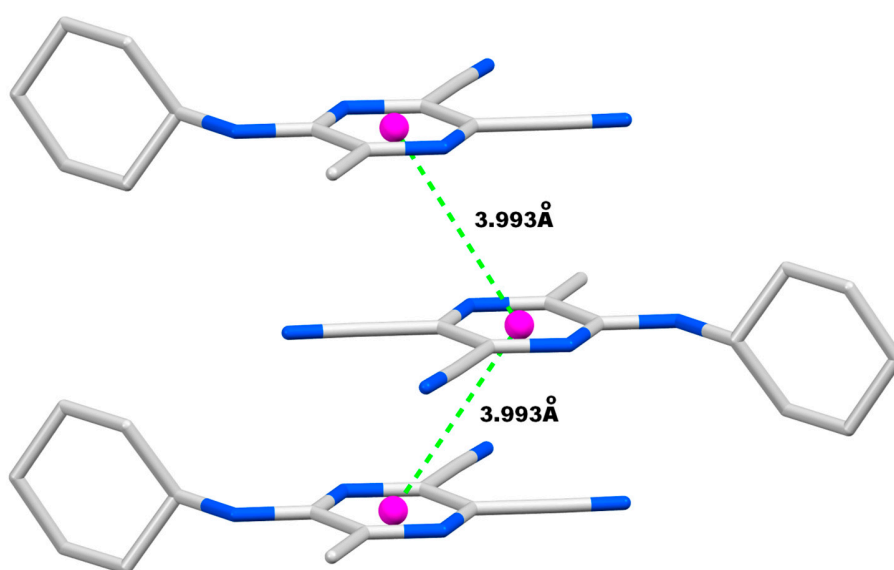

**Figure S7.**  $\pi$  -  $\pi$  interactions among **13e** molecules in their crystal network

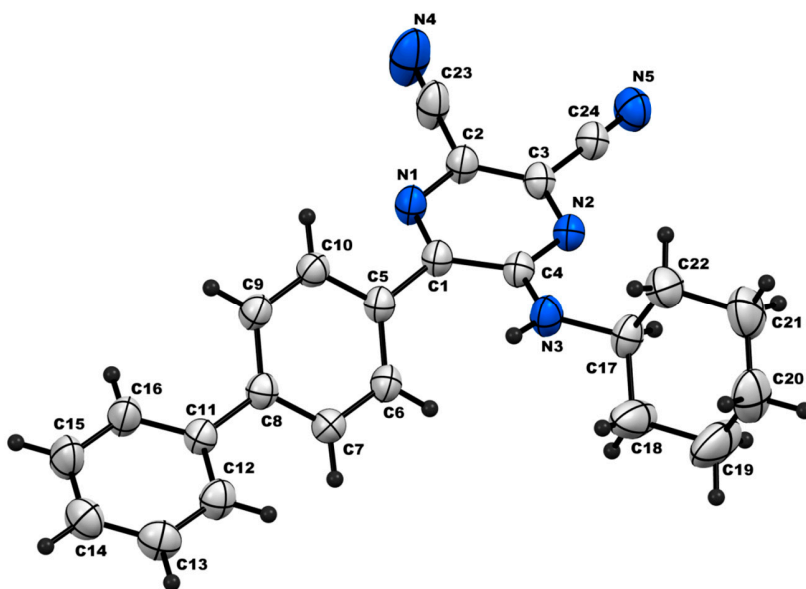

**Figure S8.** Crystal structure (Thermal ellipsoid representation) of **13f**.

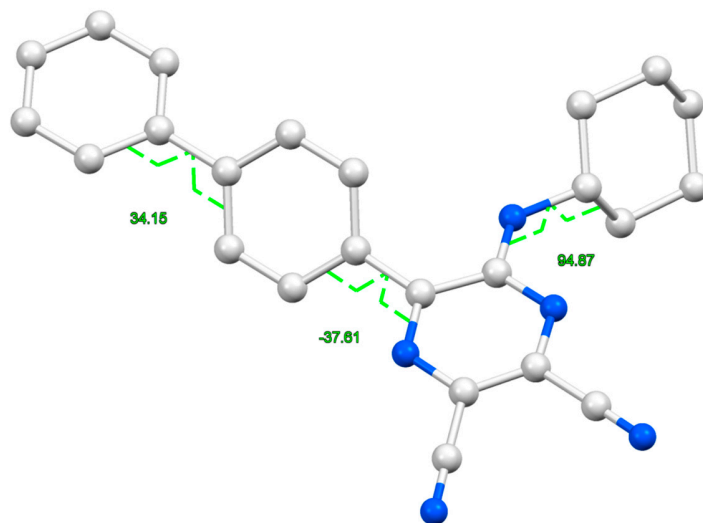

**Figure S9.** Orientation and the corresponding torsion angles of cyclohexyl and phenyl ring against the pyrazene ring along with the phenyl-phenyl orientation of the bi-phenyl moiety in the crystal structure of the molecule **13f**.

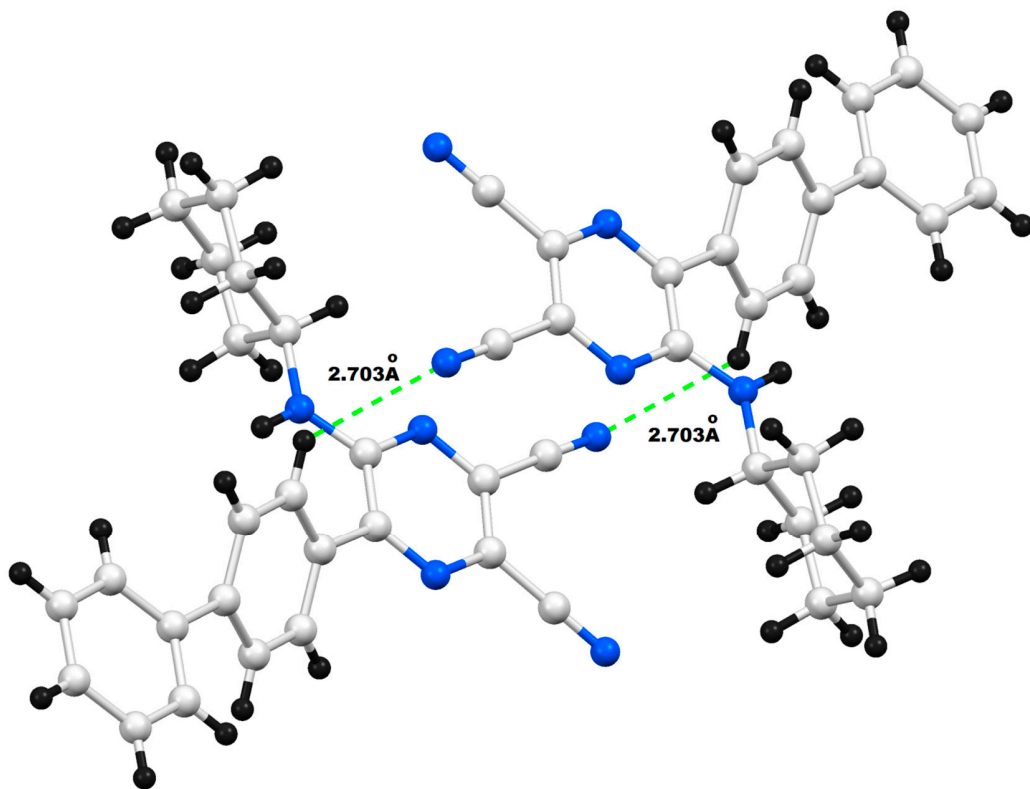

**Figure S10.** Intermolecular H-bonds experienced by **13f** molecules in its crystal network.

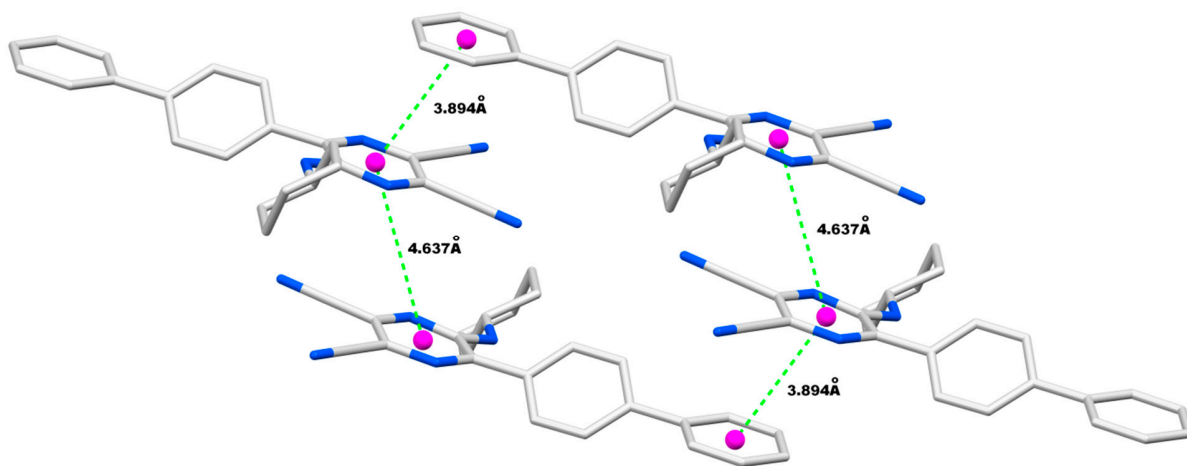

**Figure S11.**  $\pi$  -  $\pi$  interactions among **13f** molecules in their crystal network

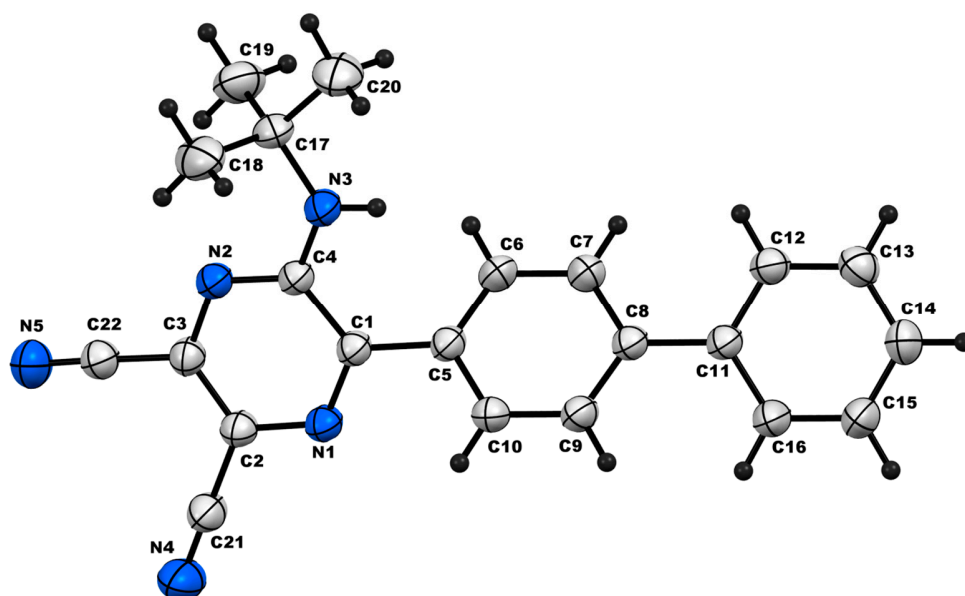

**Figure S12.** Crystal structure (Thermal ellipsoid representation) of **13k**.

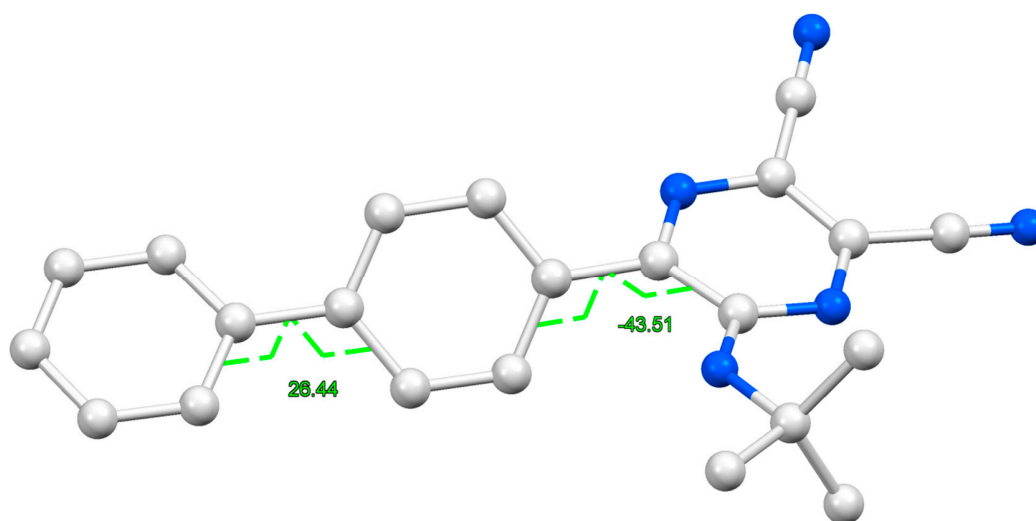

**Figure S13.** Orientation and the corresponding torsion angle of phenyl ring against the pyrazene ring along with the phenyl-phenyl orientation of the bi-phenyl moiety in the crystal structure of the molecule **13k**.

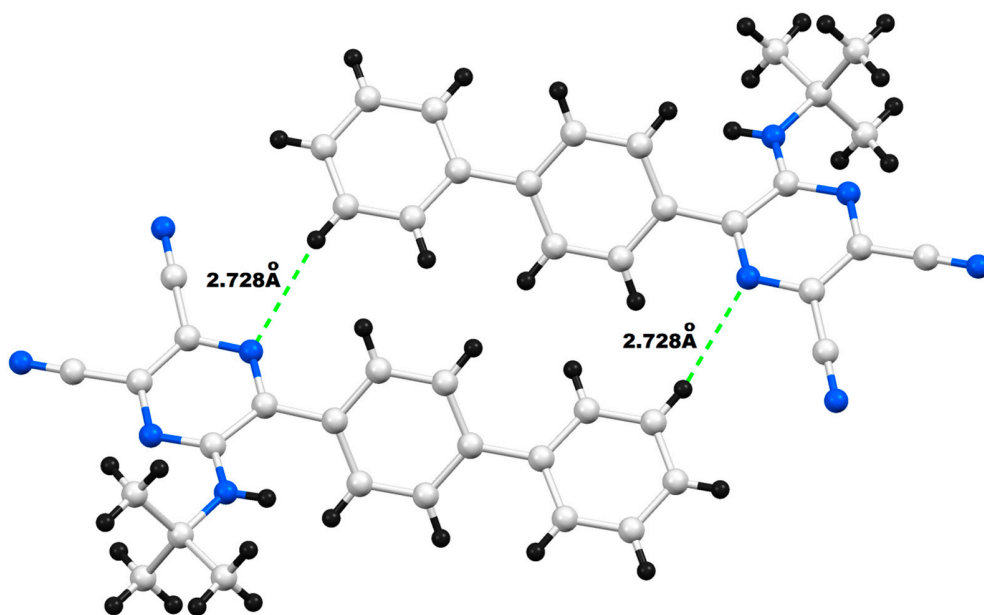

**Figure S14.** Intermolecular H-bonds experienced by **13k** molecules in its crystal network.

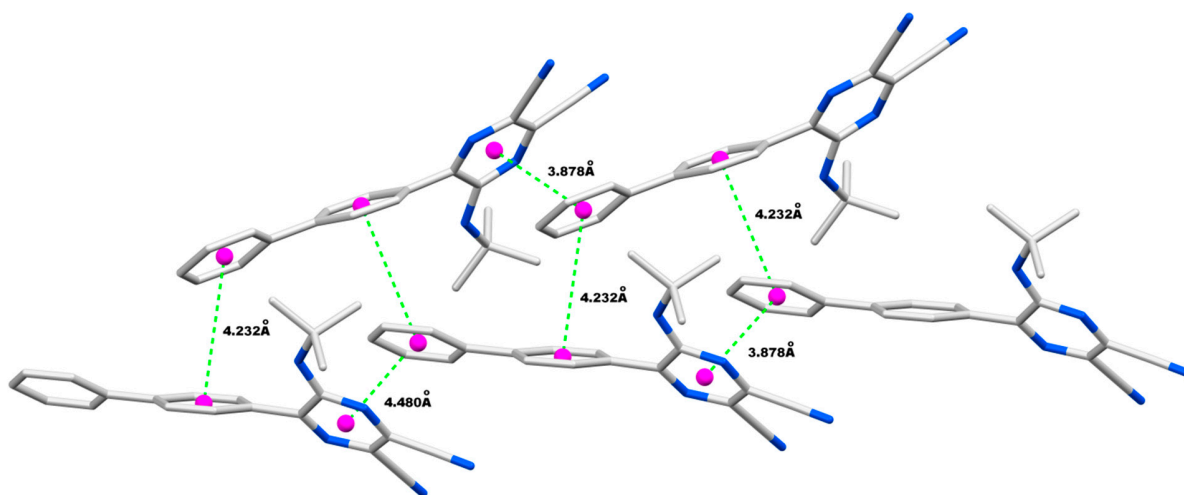

**Figure S15.**  $\pi$  -  $\pi$  interactions among **13k** molecules in their crystal network
